# Supplementary material for: A closed-shell phenalenyl-based dinuclear iron(iii) complex as a robust cathode for a one-compartment H2O2 fuel cell
Source: Royal Society of Chemistry journal article supplement (doi:10.1039/d3dt02975a), 2023-01-01
Supplement: d3dt02975a2.pdf [file d3dt02975a2.pdf]

## Supporting Information

For

### Closed-shell Phenalenyl-based Dinuclear Iron(III) Complex as a Robust Cathode for One-Compartment H<sub>2</sub>O<sub>2</sub> Fuel Cell

*Nisha Kamboj<sup>[a]</sup>, Ayan Dey<sup>[b]</sup>, Prem Lama<sup>[c]</sup>, Moumita Majumder<sup>\*[b]</sup>, Srijan Sen Gupta<sup>\*[b]</sup>,*

*Ramesh K. Metre<sup>\*[a]</sup>*

<sup>[a]</sup> Department of Chemistry, Indian Institute of Technology Jodhpur, Rajasthan- 342030, India

<sup>[b]</sup> Department of Metallurgical and Materials Engineering, Indian Institute of Technology Jodhpur, Rajasthan- 342030, India

<sup>[c]</sup> CSIR-Indian Institute of Petroleum, Haridwar Road, Mokhampur, Dehradun- 248005, India

#### Table of Contents

|                                                                                                                                              |         |
|----------------------------------------------------------------------------------------------------------------------------------------------|---------|
| 1. Materials and general methods.....                                                                                                        | S2      |
| 2. Crystallographic Details of hmbh-PLYH <sub>2</sub> and complex <b>1</b> .....                                                             | S3      |
| 3. Bond parameters of complex <b>1</b> and comparison with isostructural [Fe <sub>2</sub> <sup>III</sup> (salhn) <sub>3</sub> ] complex..... | S4      |
| 4. <sup>1</sup> H and <sup>13</sup> C NMR spectra of Hz-PLY and hmbh-PLYH <sub>2</sub> .....                                                 | S5-S6   |
| 5. HRMS spectra of Hz-PLY, hmbh-PLYH <sub>2</sub> and complex <b>1</b> .....                                                                 | S7-S8   |
| 6. FTIR spectra of Hz-PLY, hmbh-PLYH <sub>2</sub> and complex <b>1</b> .....                                                                 | S8-S9   |
| 7. TGA, Elemental analysis, XPS, and EPR spectra of complex <b>1</b> .....                                                                   | S10-11  |
| 8. Electrocatalytic reduction of H <sub>2</sub> O <sub>2</sub> on bare GC-electrode.....                                                     | S12     |
| 9. Fuel cell performance tests.....                                                                                                          | S12-S15 |
| 10. DFT calculations.....                                                                                                                    | S16-S45 |
| 11. References.....                                                                                                                          | S46     |

CORRESPONDING AUTHOR FOOTNOTE: \* To whom correspondence should be addressed. E-mail: [rkmetre@iitj.ac.in](mailto:rkmetre@iitj.ac.in), [srijansengupta@iitj.ac.in](mailto:srijansengupta@iitj.ac.in), [mmajumder@iitj.ac.in](mailto:mmajumder@iitj.ac.in)  
Phone: (+91) 291-280-1309.

## 1. Materials and general methods

All the chemicals were obtained from commercial sources, and used without further purification. Carbon black, and N-methyl pyrrolidine (NMP) were procured from Alfa Aesar, and Nafion solution (5 wt. %) was procured from Sigma Aldrich. The commercially available H<sub>2</sub>O<sub>2</sub>, 30% w/v, procured from Alfa Aesar, was used to perform the experiments. The solvents required for synthesis, and conducting CV measurements were dried and distilled using standard techniques. *9-hydroxy-1H-phenalen-1-one* was prepared using the literature method.<sup>1</sup>

Crystals suitable for single crystal X-ray diffractions (SCXRD) were loaded on a Bruker Smart Apex CCD diffractometer at 100 K. All the structures were solved by direct methods using SHELXS-97 and refined by full-matrix least squares on F<sup>2</sup> using SHELXL-97 softwares.<sup>2</sup> The details of crystallographic refinement parameters is given in Table S1. Anisotropic displacement parameters are used to refine the non-hydrogen atoms. All the hydrogen atoms were included in idealized positions, and were refined isotropically by a riding model.

The cyclic voltammetric (CV) tests were performed using a three-electrode assembly; glassy carbon (GC) working electrode, Pt counter electrode, and Ag/AgCl (3.0 M KCl) reference electrode. The electrochemical studies of complex **1** with CV were conducted in 10 ml DMF solution of complex **1** (1 mM) and the supporting electrolyte, tetrabutylammonium hexafluorophosphate (0.1 M). The CV measurements were carried out under an oxygen-free atmosphere by purging nitrogen gas, and the scan rate was fixed at 50 mV s<sup>-1</sup>. To test H<sub>2</sub>O<sub>2</sub> fuel cell activity, the modified GC electrode and Ni foam anode were immersed in the supporting electrolyte for at least 5 min before adding H<sub>2</sub>O<sub>2</sub> to the electrolytic solution. The performance tests are repeated at least 5 times to ensure the reproducibility.

## 2. Crystallographic data for the hmbh-PLYH<sub>2</sub> ligand and complex **1**.

**Table S1.** Crystal data and structure refinement parameters for the ligand, hmbh-PLYH<sub>2</sub> and complex **1**.

|                                                   |                                                               |                                                                                               |
|---------------------------------------------------|---------------------------------------------------------------|-----------------------------------------------------------------------------------------------|
| <b>Identification code</b>                        | hmbh-PLYH <sub>2</sub>                                        | Complex <b>1</b>                                                                              |
| <b>Empirical formula</b>                          | C <sub>21</sub> H <sub>16</sub> N <sub>2</sub> O <sub>3</sub> | C <sub>65</sub> H <sub>44</sub> N <sub>6</sub> O <sub>9</sub> Cl <sub>6</sub> Fe <sub>2</sub> |
| <b>Formula weight</b>                             | 344.36                                                        | 1377.46                                                                                       |
| <b>Temperature/K</b>                              | 100                                                           | 100                                                                                           |
| <b>Crystal system</b>                             | orthorhombic                                                  | monoclinic                                                                                    |
| <b>Space group</b>                                | <i>Aba2</i>                                                   | <i>P2<sub>1</sub>/c</i>                                                                       |
| <b>a/Å</b>                                        | 16.38(2)                                                      | 23.2460(12)                                                                                   |
| <b>b/Å</b>                                        | 29.87(4)                                                      | 13.2054(7)                                                                                    |
| <b>c/Å</b>                                        | 6.843(9)                                                      | 19.6226(10)                                                                                   |
| <b>α/°</b>                                        | 90                                                            | 90                                                                                            |
| <b>β/°</b>                                        | 90                                                            | 101.358(2)                                                                                    |
| <b>γ/°</b>                                        | 90                                                            | 90                                                                                            |
| <b>Volume/Å<sup>3</sup></b>                       | 3348(7)                                                       | 5905.6(5)                                                                                     |
| <b>Z</b>                                          | 8                                                             | 4                                                                                             |
| <b>ρ<sub>calc</sub>/g/cm<sup>3</sup></b>          | 1.366                                                         | 1.549                                                                                         |
| <b>μ/mm<sup>-1</sup></b>                          | 0.093                                                         | 0.829                                                                                         |
| <b>F(000)</b>                                     | 1440.0                                                        | 2808.0                                                                                        |
| <b>Crystal size/mm<sup>3</sup></b>                | 0.21 × 0.19 × 0.16                                            | 0.2 × 0.19 × 0.16                                                                             |
| <b>Radiation</b>                                  | MoKα (λ = 0.71073)                                            | MoKα (λ = 0.71073)                                                                            |
| <b>2θ range for data collection/°</b>             | 5.996 to 49.998                                               | 4.234 to 50.698                                                                               |
| <b>Index ranges</b>                               | -14 ≤ h ≤ 19, -34 ≤ k ≤ 35, -8 ≤ l ≤ 8                        | -28 ≤ h ≤ 28, -15 ≤ k ≤ 15, -23 ≤ l ≤ 16                                                      |
| <b>Reflections collected</b>                      | 10271                                                         | 52543                                                                                         |
| <b>Independent reflections</b>                    | 2837 [R <sub>int</sub> = 0.0935, R <sub>sigma</sub> = 0.1068] | 10810 [R <sub>int</sub> = 0.0501, R <sub>sigma</sub> = 0.0430]                                |
| <b>Data/restraints/parameters</b>                 | 2837/7/231                                                    | 10810/0/805                                                                                   |
| <b>Goodness-of-fit on F<sup>2</sup></b>           | 1.133                                                         | 1.080                                                                                         |
| <b>Final R indexes [I ≥ 2σ (I)]</b>               | R <sub>1</sub> = 0.0973, wR <sub>2</sub> = 0.1617             | R <sub>1</sub> = 0.0797, wR <sub>2</sub> = 0.1928                                             |
| <b>Final R indexes [all data]</b>                 | R <sub>1</sub> = 0.1336, wR <sub>2</sub> = 0.1759             | R <sub>1</sub> = 0.0990, wR <sub>2</sub> = 0.2043                                             |
| <b>Largest diff. peak/hole / e Å<sup>-3</sup></b> | 0.25/-0.28                                                    | 1.01/-1.18                                                                                    |

**3. Bond parameters of complex **1**, and comparison with the iso-structural [Fe<sub>2</sub><sup>III</sup>(salhn)<sub>3</sub>] complex.**

**Table S2.** Comparison of the bond distances of the reported  $[\text{Fe}_2^{\text{III}}(\text{salhn})_3]$  complex<sup>3</sup> with complex **1**.

| $[\text{Fe}_2^{\text{III}}(\text{salhn})_3]$ |                   | $[\text{Fe}^{\text{III}}_2(\text{hmbh-PLY})_3]$ , complex <b>1</b> |                   |
|----------------------------------------------|-------------------|--------------------------------------------------------------------|-------------------|
| Bond                                         | Bond Distance (Å) | Bond                                                               | Bond Distance (Å) |
| Fe1-O1                                       | 1.930(5)          | Fe1-O1                                                             | 1.935(4)          |
| Fe1-O3                                       | 1.925(3)          | Fe1-O8                                                             | 1.923(4)          |
| Fe1-O5                                       | 1.912(4)          | Fe1-O5                                                             | 1.906 (4)         |
| Fe1-N1                                       | 2.164(5)          | F1-N1                                                              | 2.123(4)          |
| Fe1-N3                                       | 2.197(6)          | Fe1-N4                                                             | 2.194(4)          |
| Fe1-N5                                       | 2.178(4)          | Fe1-N6                                                             | 2.222(4)          |
| Fe2-O2                                       | 1.910(5)          | Fe2-O2                                                             | 1.940(4)          |
| Fe2-O4                                       | 1.927(3)          | Fe2-O4                                                             | 1.916(4)          |
| Fe2-O6                                       | 1.919(5)          | Fe2-O7                                                             | 1.933(4)          |
| Fe2-N2                                       | 2.167(4)          | Fe2-N5                                                             | 2.087(4)          |
| Fe2-N4                                       | 2.183(5)          | Fe2-N3                                                             | 2.115(4)          |
| Fe2-N6                                       | 2.182(5)          | Fe2-N2                                                             | 2.188(4)          |

**Table S3.** Comparison of the bond angles of the reported  $[\text{Fe}_2^{\text{III}}(\text{salhn})_3]$  complex with complex **1**.

| $[\text{Fe}_2^{\text{III}}(\text{salhn})_3]$ |                | $[\text{Fe}^{\text{III}}_2(\text{hmbh-PLY})_3]$ , complex <b>1</b> |                |
|----------------------------------------------|----------------|--------------------------------------------------------------------|----------------|
| Atoms                                        | Bond Angle (°) | Atoms                                                              | Bond Angle (°) |
| O1-Fe1-N3                                    | 169.6(2)       | O8-Fe1-N4                                                          | 168.74(17)     |
| O5-Fe1-N1                                    | 169.9(1)       | O5-Fe1-N1                                                          | 170.38(16)     |
| O3-Fe1-N3                                    | 84.8(2)        | O1-Fe1-N6                                                          | 82.71(15)      |
| O1-Fe1-N5                                    | 92.6(2)        | O5-Fe1-O1                                                          | 95.11(17)      |
| O3-Fe1-O5                                    | 97.8(2)        | O1-Fe1-N1                                                          | 94.49(17)      |
| O1-Fe1-N1                                    | 84.4(2)        | O5-Fe1-N6                                                          | 87.97(15)      |
| N1-Fe1-N3                                    | 85.3(2)        | N1-Fe1-N6                                                          | 87.16(15)      |
| O2-Fe2-N6                                    | 171.0(1)       | O7-Fe2-N2                                                          | 171.76(17)     |
| O4-Fe2-N2                                    | 167.6(2)       | O4-Fe2-N5                                                          | 167.45(16)     |
| O2-Fe2-N4                                    | 92.1(2)        | O2-Fe2-N3                                                          | 90.90(16)      |
| O2-Fe2-O4                                    | 99.1(2)        | O4-Fe2-O2                                                          | 89.83(16)      |
| N4-Fe2-N6                                    | 86.9(2)        | N5-Fe2-N3                                                          | 96.14(17)      |
| O2-Fe2-O6                                    | 84.4(2)        | O2-Fe2-N5                                                          | 84.09(16)      |
| O6-Fe2-N6                                    | 170.7(2)       | O4-Fe2-N3                                                          | 165.94(16)     |

#### 4. $^1\text{H}$ NMR and $^{13}\text{C}$ NMR Spectra

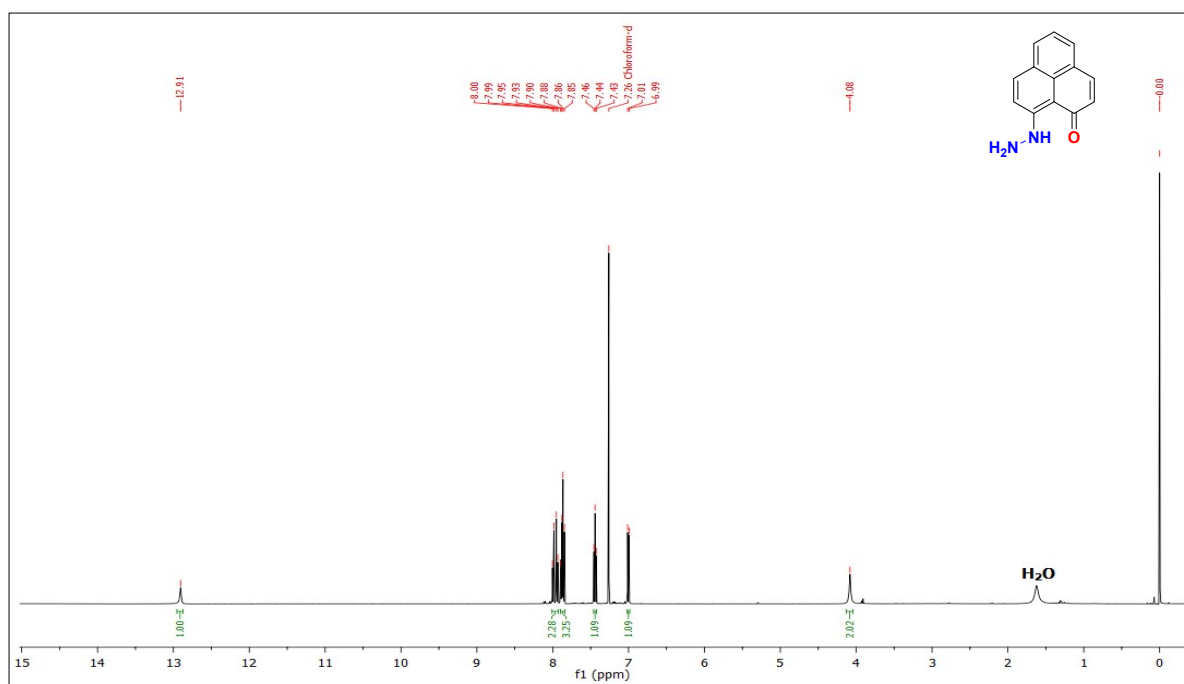

**Figure S1.**  $^1\text{H}$  NMR spectrum of Hz-PLY in  $\text{CDCl}_3$  solvent.

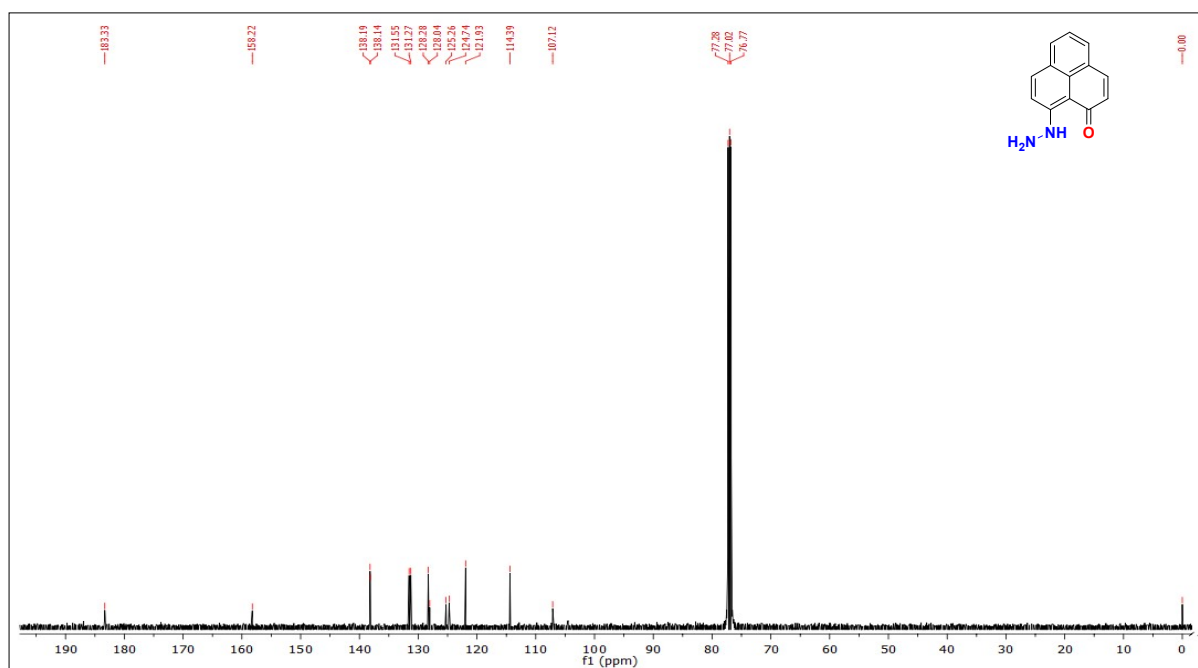

**Figure S2.**  $^{13}\text{C}$  NMR spectrum of Hz-PLY in  $\text{CDCl}_3$  solvent.

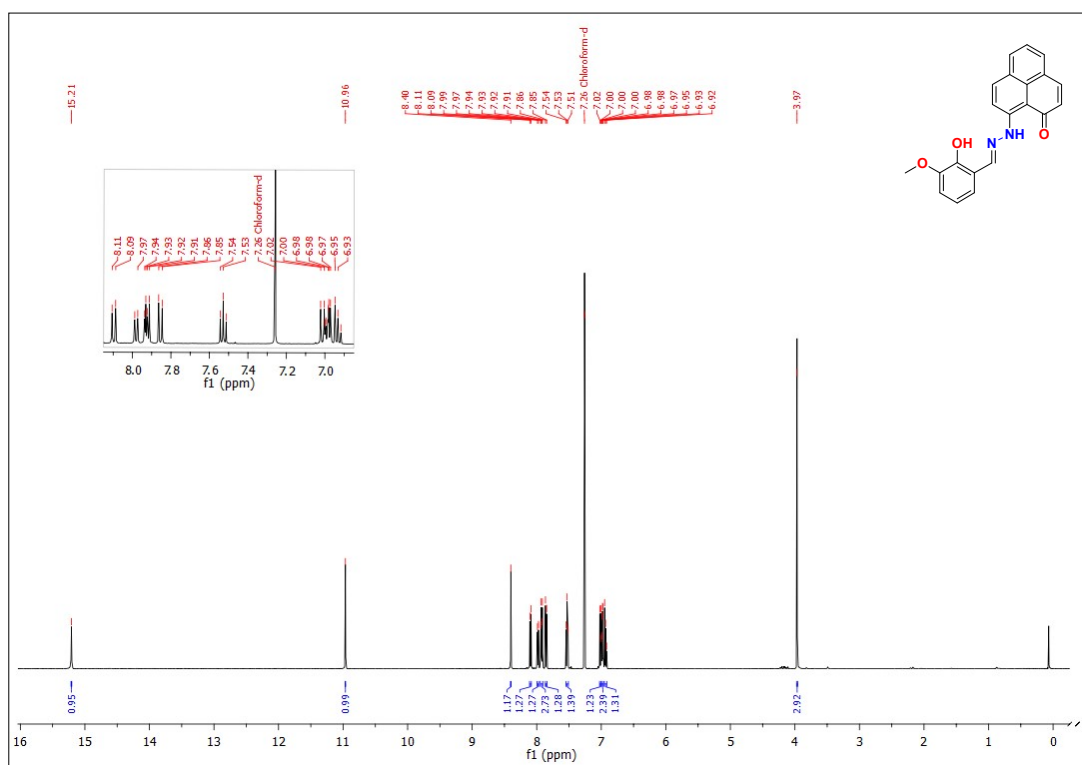

**Figure S3.**  $^1\text{H}$  NMR spectrum of hmbh-PLYH<sub>2</sub> in CDCl<sub>3</sub> solvent.

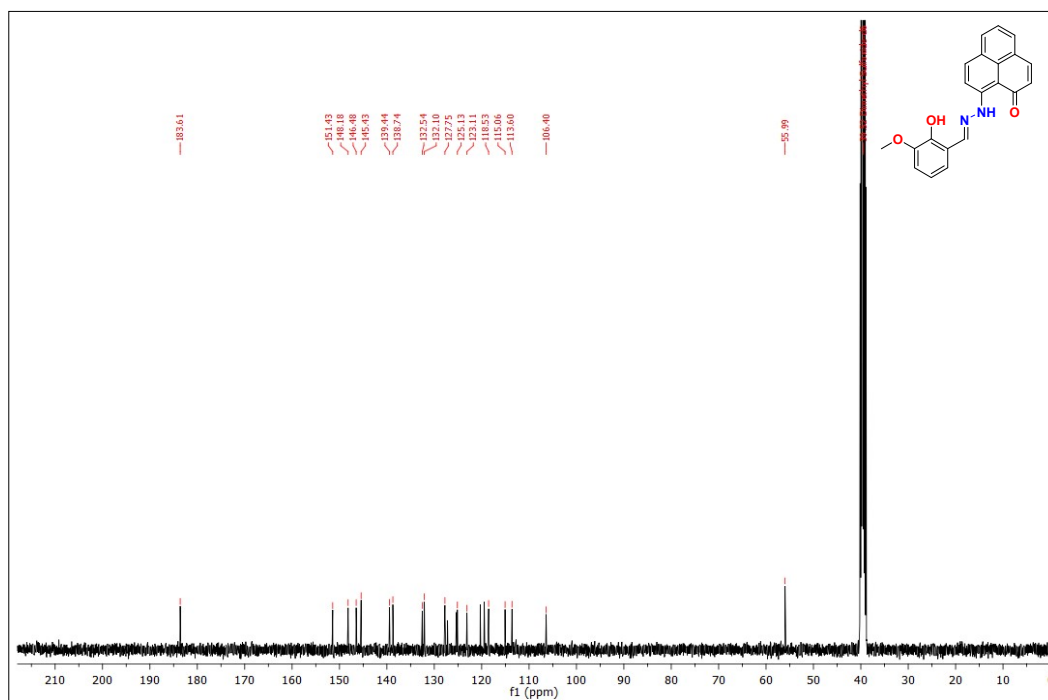

**Figure S4.**  $^{13}\text{C}$  NMR spectrum of hmbh-PLYH<sub>2</sub> in DMSO-d<sub>6</sub> solvent.

## 5. HRMS Spectra of Hz-PLY, hmbh-PLYH<sub>2</sub> and complex 1.

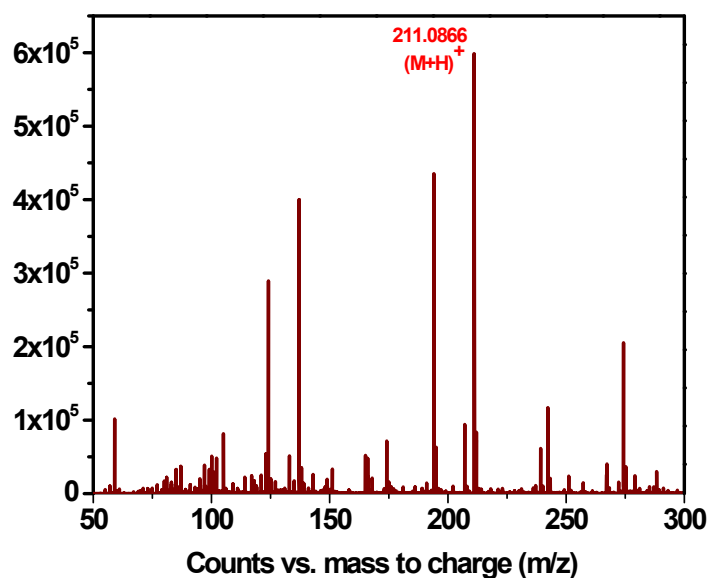

**Figure S5.** HRMS spectrum of Hz-PLY. HRMS (CH<sub>3</sub>CN, positive ionization): calcd. for C<sub>13</sub>H<sub>10</sub>N<sub>2</sub>O m/z = 211.0867 [M + H]<sup>+</sup>, found 211.0866 [M + H]<sup>+</sup>.

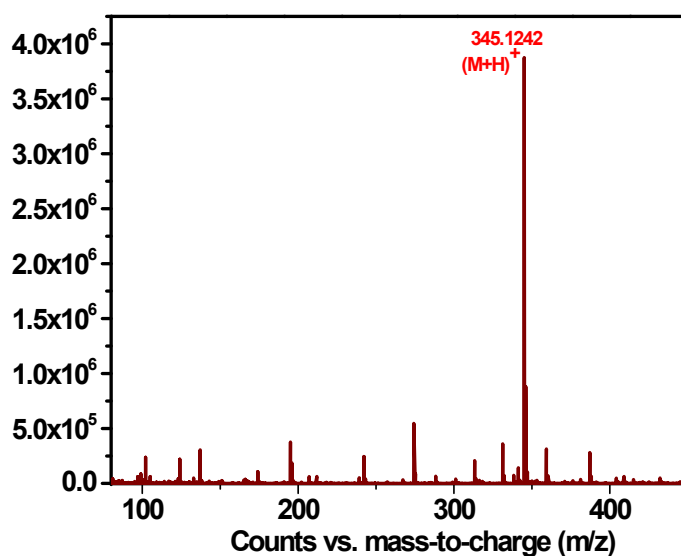

**Figure S6.** HRMS spectrum of hmbh-PLYH<sub>2</sub>. HRMS (CH<sub>3</sub>CN, positive ionization): calcd. for C<sub>21</sub>H<sub>16</sub>N<sub>2</sub>O<sub>3</sub> m/z = 345.1234 [M + H]<sup>+</sup>, found 345.1242 [M + H]<sup>+</sup>.

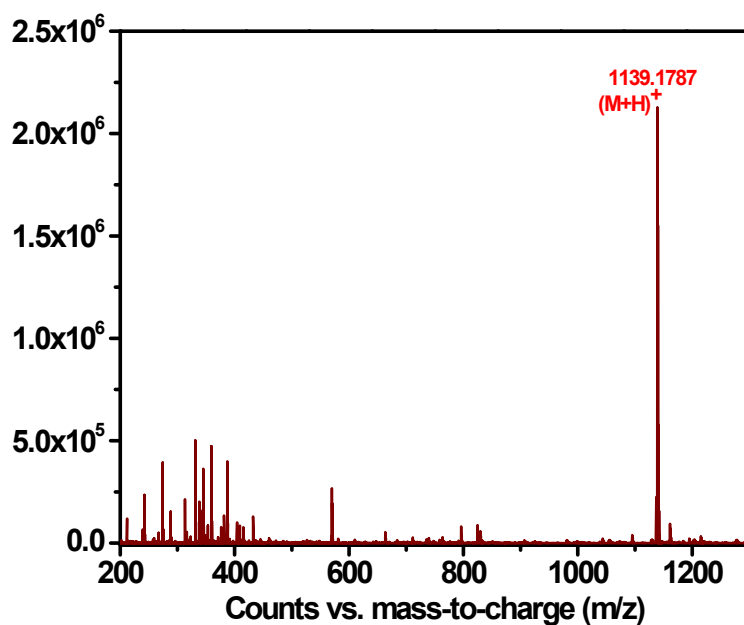

**Figure S7.** HRMS spectrum of complex **1**. HRMS (CH<sub>3</sub>CN, positive ionization): calcd. for C<sub>63</sub>H<sub>42</sub>Fe<sub>2</sub>N<sub>6</sub>O<sub>9</sub> m/z = 1139.1785 (M+H)<sup>+</sup>, found 1139.1787 [M + H]<sup>+</sup>.

**6. FT-IR Spectra of 9-hydrazineyl-1H-phenalen-1-one, hmbh-PLYH<sub>2</sub> and complex **1**.**

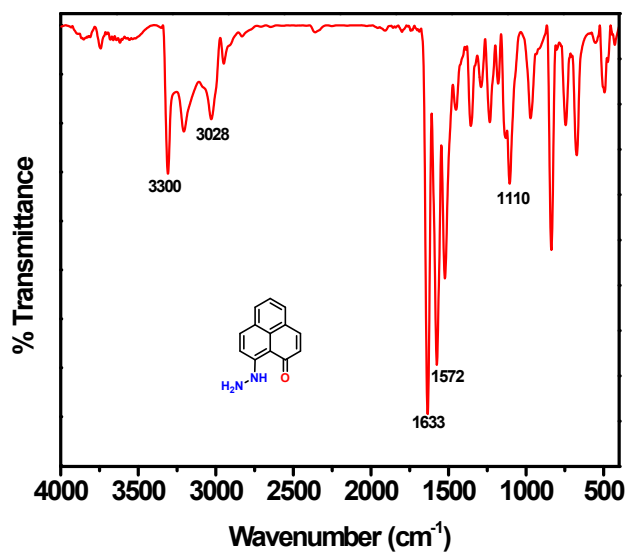

**Figure S8.** FT-IR spectrum of Hz-PLY.

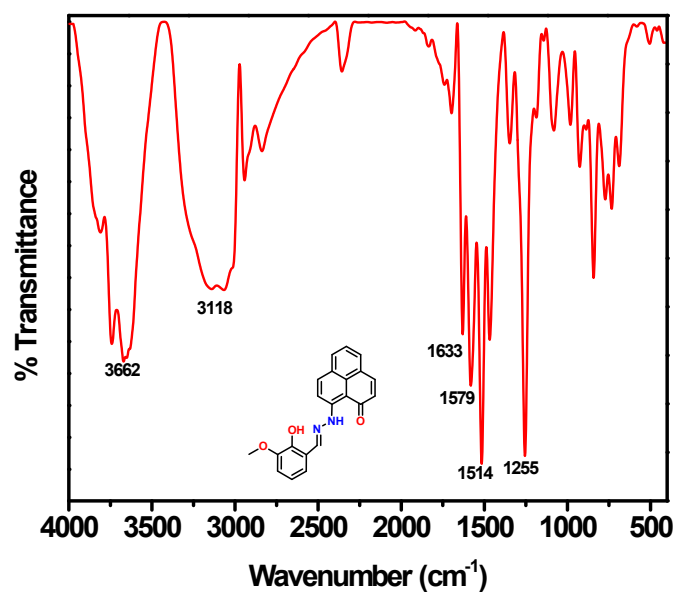

**Figure S9.** FT-IR spectrum of hmbh-PLYH<sub>2</sub>.

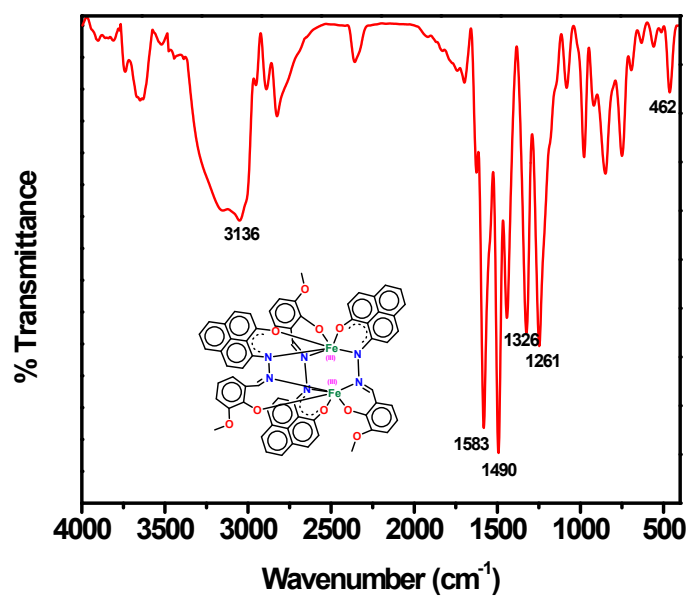

**Figure S10.** FT-IR spectrum of complex 1.

## 7. Thermal stability, EPR, XPS and elemental analysis of the complex 1.

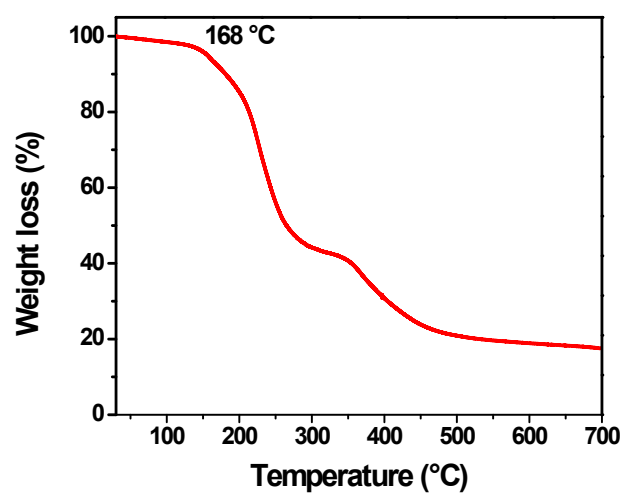

**Figure S11.** Thermogravimetric analysis (TGA) plot of the complex **1**.

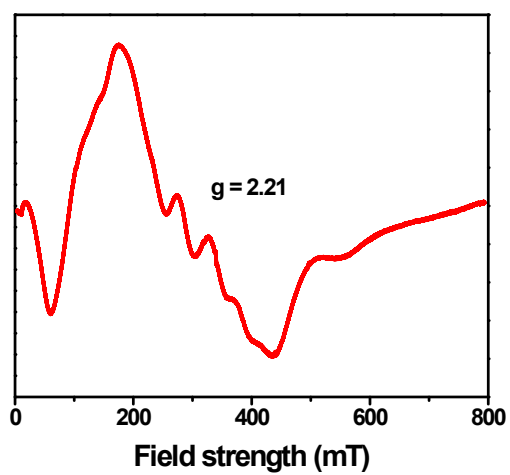

**Figure S12.** Solid state X-band EPR of complex **1** recorded at room temperature.

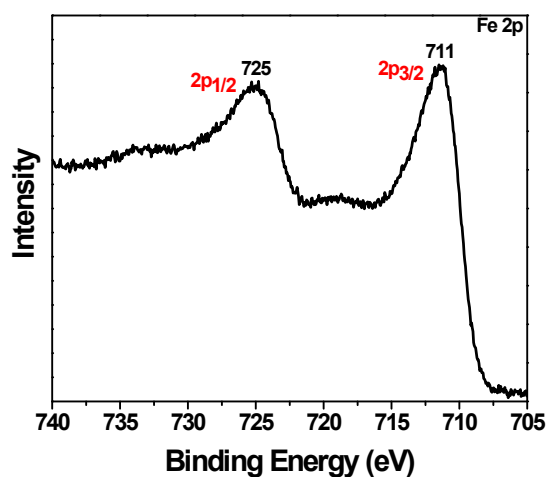

**Figure S13.** XPS analysis of the complex 1.

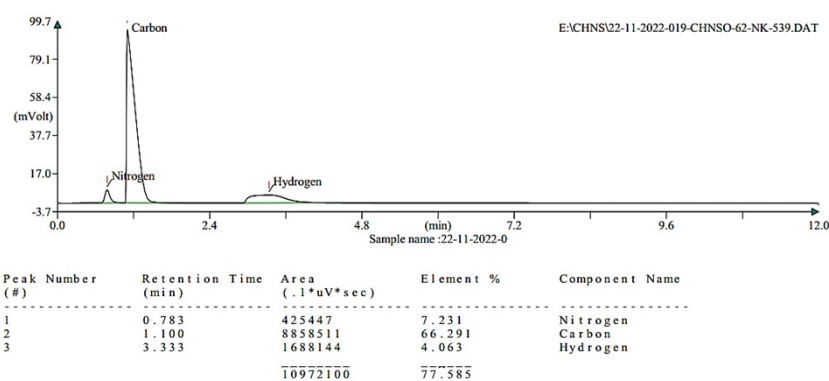

**Figure S14.** Elemental analysis of complex 1: calcd. for  $C_{63}H_{42}Fe_2N_6O_9$ : C, 66.45; H, 3.72; N, 7.38. Found: C, 66.29; H, 4.06; N, 7.23.

## 8. Electrocatalytic reduction of $\text{H}_2\text{O}_2$ .

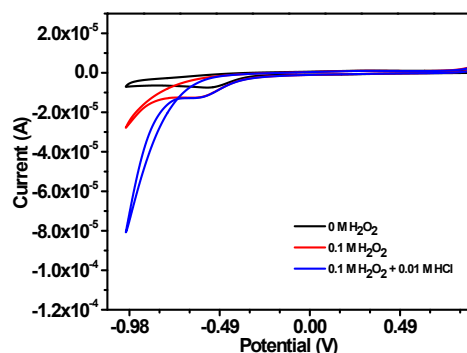

**Figure S15.** Electrocatalytic reduction of  $\text{H}_2\text{O}_2$  with bare glassy carbon (GC) electrode in acetate buffer (pH 3), and acetate buffer (pH 3) containing 0.01 M HCl solution in the presence of  $\text{H}_2\text{O}_2$  (0 M and 0.1 M, as mentioned in the graph). Ag/AgCl(3.0 M KCl) electrode is used as the reference, Pt-wire as the counter electrode, and a scan rate of  $100 \text{ mV s}^{-1}$  was maintained during the experiment.

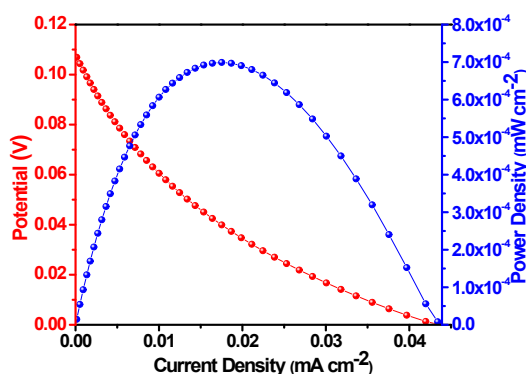

**Figure S16.**  $I$ - $V$  (red) and  $I$ - $P$  (blue) curves of one-compartment  $\text{H}_2\text{O}_2$  fuel cell with GC-1 cathode, and Ni foam anode at a scan rate  $10 \text{ mV s}^{-1}$ . The performance tests were conducted in an acetate buffer (pH 3) containing 0.3 M  $\text{H}_2\text{O}_2$ . Current density is normalized by the geometrical area of glassy carbon electrode.

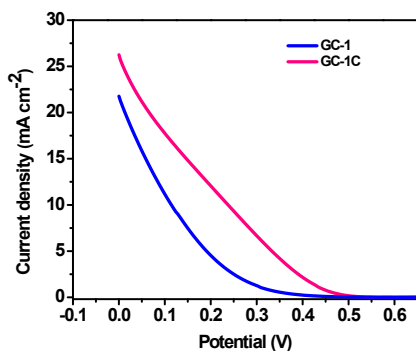

**Figure S17.** Polarization curves for **GC-1** (blue curve)/**GC-1C** (pink curve) as cathode in 0.1 M HCl containing 0.3 M H<sub>2</sub>O<sub>2</sub>, and Ni foam as the anode in one compartment H<sub>2</sub>O<sub>2</sub> fuel cell at a scan rate 10 mV s<sup>-1</sup>. Current density is normalized by the geometrical area of glassy carbon electrode.

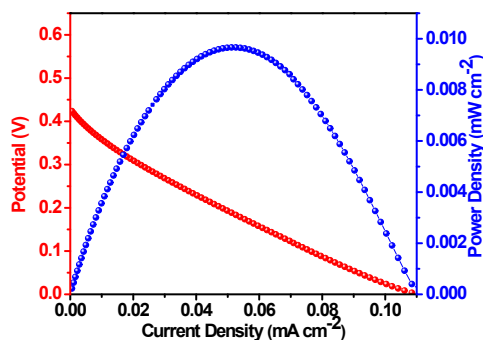

**Figure S18.** *I-V* (red) and *I-P* (blue) curves of a one-compartment H<sub>2</sub>O<sub>2</sub> fuel cell with bare glassy carbon (GC) cathode and Ni foam as anode, at a scan rate 10 mV s<sup>-1</sup>. The performance tests were conducted in 0.1 M HCl containing 0.3 M H<sub>2</sub>O<sub>2</sub>. Current density is normalized by the geometrical area of glassy carbon electrode.

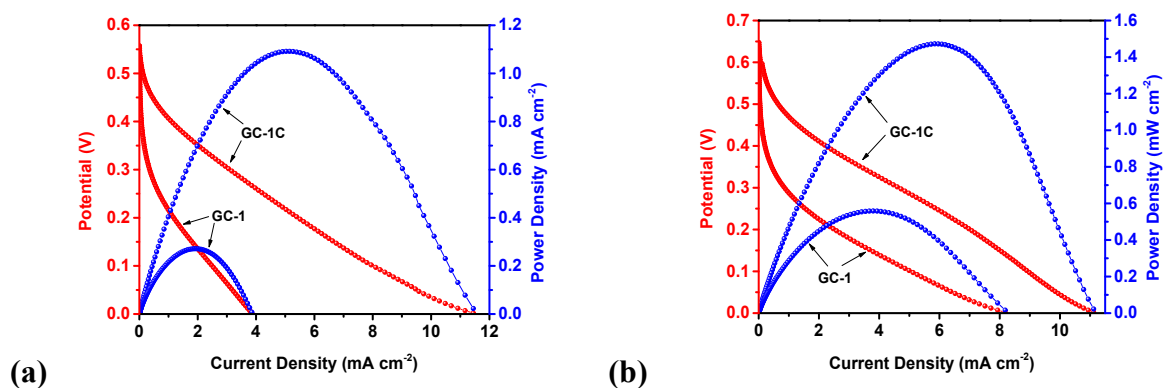

**Figure S19.**  $I$ - $V$  (red) and  $I$ - $P$  (blue) curves of a one-compartment  $\text{H}_2\text{O}_2$  fuel cell with GC-1/GC-1C cathode and Ni foam anode, at a scan rate  $10 \text{ mV s}^{-1}$ . The performance tests were conducted in (a) 0.05 M and (b) 0.2 M HCl containing 0.3 M  $\text{H}_2\text{O}_2$ . Current density is normalized by the geometrical area of glassy carbon electrode.

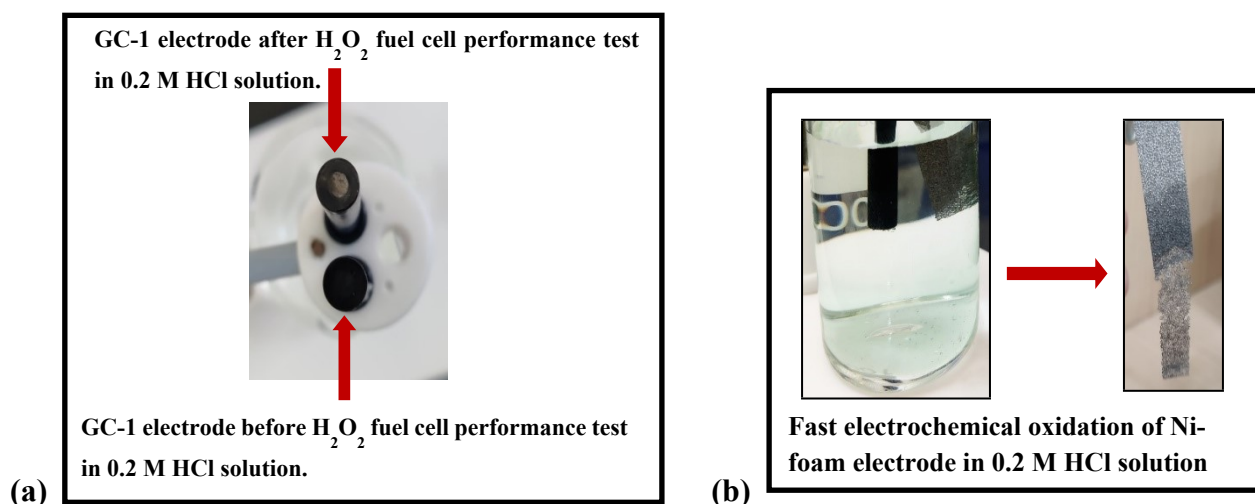

**Figure S20.** Image showing (a) GC-1 electrode, before and after the fuel cell performance test in 0.2 M HCl as the electrolyte, and (b) the corrosion of Ni foam anode while running the performance tests in 0.2 M HCl as the electrolyte.

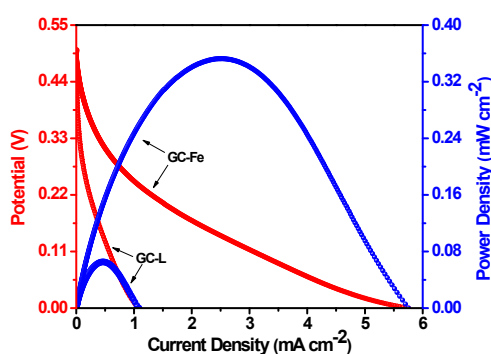

**Figure S21.**  $I$ - $V$  (red) and  $I$ - $P$  (blue) curves of a one-compartment  $\text{H}_2\text{O}_2$  fuel cell with Ni-foam anode and  $\text{FeCl}_3$  (GC-Fe) modified cathode; and Ni-foam anode and ligand, hmbh-PLYH<sub>2</sub> (GC-L) modified cathode at a scan rate  $10 \text{ mV s}^{-1}$ . The performance tests were

conducted in 0.1 M HCl containing 0.3 M H<sub>2</sub>O<sub>2</sub>. Current density is normalized by the geometrical area of glassy carbon electrode.

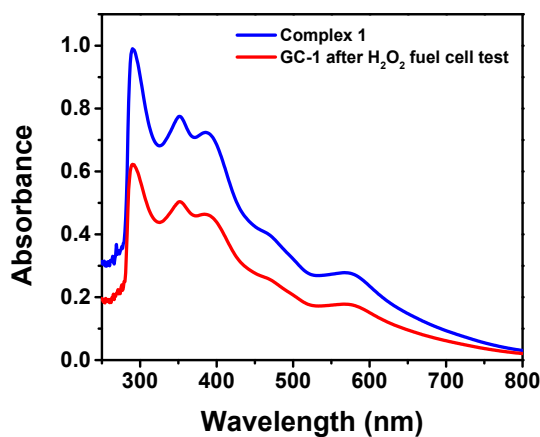

**Figure S22.** UV-vis spectra of complex **1** (blue line) and the recovered catalyst from **GC-1** electrode (red line) after running the H<sub>2</sub>O<sub>2</sub> fuel cell test.

**Anode:**  $\text{H}_2\text{O}_2 \rightarrow \text{O}_2 + 2\text{H}^+ + 2\text{e}^-$  ( $E^\circ_{\text{ox}} = 0.68 \text{ V vs. NHE}$ ) equation.....S1

**Cathode:**  $\text{H}_2\text{O}_2 + 2\text{H}^+ + 2\text{e}^- \rightarrow 2\text{H}_2\text{O}$  ( $E^\circ_{\text{red}} = 1.78 \text{ V vs. NHE}$ ) equation.....S2

**Overall reaction:**  $2\text{H}_2\text{O}_2 \rightarrow \text{O}_2 + 2\text{H}_2\text{O}$  ( $E^\circ_{\text{cell}} = 1.09 \text{ V vs. NHE}$ ) equation.....S3

**Scheme S1.** Electrochemical equations for the one-compartment H<sub>2</sub>O<sub>2</sub> fuel cell, and the potentials vs. Normal Hydrogen Electrode (NHE).

## 9. DFT calculations

The optimized geometry parameters around the metal centre of the distorted octahedral complex **1** in its high spin ( $S = 5$ ) and broken symmetry spin states are presented in Table S4 along with respective experimental X-ray values for comparison. The DFT calculated bond distance and bond angle values obtained at method 1 (B3LYP/def2-SVP), method 2 (B3LYP+D3BJ/def2-SVP+def2-TZVP), method 3 (BP86+D3BJ/def2-SVP+def2-TZVP) are in good accord with the X-ray values with mean absolute deviation for bond distance values are estimated as 0.031, 0.028, 0.031 Å. The method 2 is selected for the present study. Note that, the metal ions are treated with def2-TZVP basis function during optimization.

Broken symmetry analysis is performed for **1** to **1**<sup>-4</sup> complexes. The magnetic coupling constant ( $J$ ) is obtained using eq.

$$J = - \frac{(E_{HS} - E_{BS})}{\langle S_{max}^2 \rangle - \langle S_{min}^2 \rangle}$$

Where,  $(E_{HS} - E_{BS})$  is the energy difference between high spin (HS) and broken symmetry (BS) spin states and  $S_{max}^2$ ,  $S_{min}^2$  are maximum and minimum magnetic spin moment values.

**Table S4.** Experimental (X-ray) and DFT optimized bond lengths around the transition metal (Fe) centers of the diiron(III) complex in its HS-HS ( S = 5) and HS-BS (S = 0). M1 = B3LYP/def2-SVP, M2 = B3LYP+D3BJ/def2-SVP+def2-TZVP, and M3 = BP86+D3BJ/def2-SVP+def2-TZVP). Bond lengths are given in Å.

|                              | <i>X-ray</i> | <i>Theoretical values</i> |              |              |              |
|------------------------------|--------------|---------------------------|--------------|--------------|--------------|
|                              |              |                           | <b>HS-HS</b> |              | <b>HS-BS</b> |
|                              |              | Method 1                  | Method 2     | Method 3     | Method 1     |
| <b><i>Fe1-O8</i></b>         | 1.92284      | 1.93388                   | 1.92668      | 1.93293      | 1.93476      |
| <b><i>Fe1-O1</i></b>         | 1.93482      | 1.96268                   | 1.95195      | 1.97649      | 1.96321      |
| <b><i>Fe1-O5</i></b>         | 1.90552      | 1.93444                   | 1.92497      | 1.93918      | 1.93568      |
| <b><i>Fe1-N1</i></b>         | 2.12272      | 2.17895                   | 2.17002      | 2.14833      | 2.17701      |
| <b><i>Fe1-N6</i></b>         | 2.22154      | 2.21055                   | 2.22931      | 2.21829      | 2.20973      |
| <b><i>Fe1-N4</i></b>         | 2.19359      | 2.24161                   | 2.23546      | 2.24145      | 2.24051      |
| <b><i>Fe2-O4</i></b>         | 1.91546      | 1.96415                   | 1.95795      | 1.95753      | 1.96518      |
| <b><i>Fe2-O2</i></b>         | 1.94024      | 1.931                     | 1.92471      | 1.93036      | 1.93279      |
| <b><i>Fe2-O7</i></b>         | 1.93334      | 1.96135                   | 1.94929      | 1.97399      | 1.96222      |
| <b><i>Fe2-N2</i></b>         | 2.18752      | 2.24085                   | 2.24258      | 2.24662      | 2.23982      |
| <b><i>Fe2-N5</i></b>         | 2.08708      | 2.17166                   | 2.16348      | 2.13945      | 2.1701       |
| <b><i>Fe2-N3</i></b>         | 2.11589      | 2.18755                   | 2.17127      | 2.1794       | 2.18635      |
| <b><i>N1-N2</i></b>          | 1.4278       | 1.39802                   | 1.39377      | 1.38572      | 1.39643      |
| <b><i>N6-N5</i></b>          | 1.41773      | 1.3971                    | 1.39418      | 1.38655      | 1.39531      |
| <b><i>N4-N3</i></b>          | 1.43062      | 1.39811                   | 1.39435      | 1.38692      | 1.39653      |
| <b><i>O1-Fe1-N6</i></b>      | 170.3849     | 170.8865                  | 169.0994     | 170.3281     | 170.9741     |
| <b><i>O5-Fe1-N1</i></b>      | 168.7467     | 166.7828                  | 166.6057     | 165.4511     | 166.8412     |
| <b><i>O8-Fe1-N4</i></b>      | 165.9458     | 168.2884                  | 165.2623     | 166.2056     | 168.3589     |
| <b><i>O4-Fe2-N5</i></b>      | 171.7548     | 169.9623                  | 169.1666     | 169.4211     | 169.9599     |
| <b><i>O2-Fe2-N3</i></b>      | 167.4431     | 166.1594                  | 165.4062     | 165.6744     | 166.1898     |
| <b><i>O7-Fe2-N2</i></b>      | 172.2738     | 170.758                   | 169.3859     | 169.9418     | 170.8186     |
| <b><i>Fe1-N4-N3-Fe2</i></b>  | 64.9497      | 63.1119                   | 69.0727      | 64.8317      | 62.9905      |
| <b><i>Fe1-N1-N2-Fe2</i></b>  | 65.5179      | 64.2503                   | 68.34        | 69.7711      | 64.1186      |
| <b><i>Fe1-N6-N5-Fe2</i></b>  | 63.2717      | 67.0845                   | 69.3545      | 72.003       | 66.9174      |
| <i>Average</i>               |              | -0.11038                  | 0.0699       | 0.1511       | -0.1154      |
| <i>Average(distance)</i>     |              | 0.0237                    | 0.0182       | 0.0191       | 0.0233       |
| <b><i>MAD (distance)</i></b> |              | <b>0.031</b>              | <b>0.028</b> | <b>0.031</b> | <b>0.031</b> |

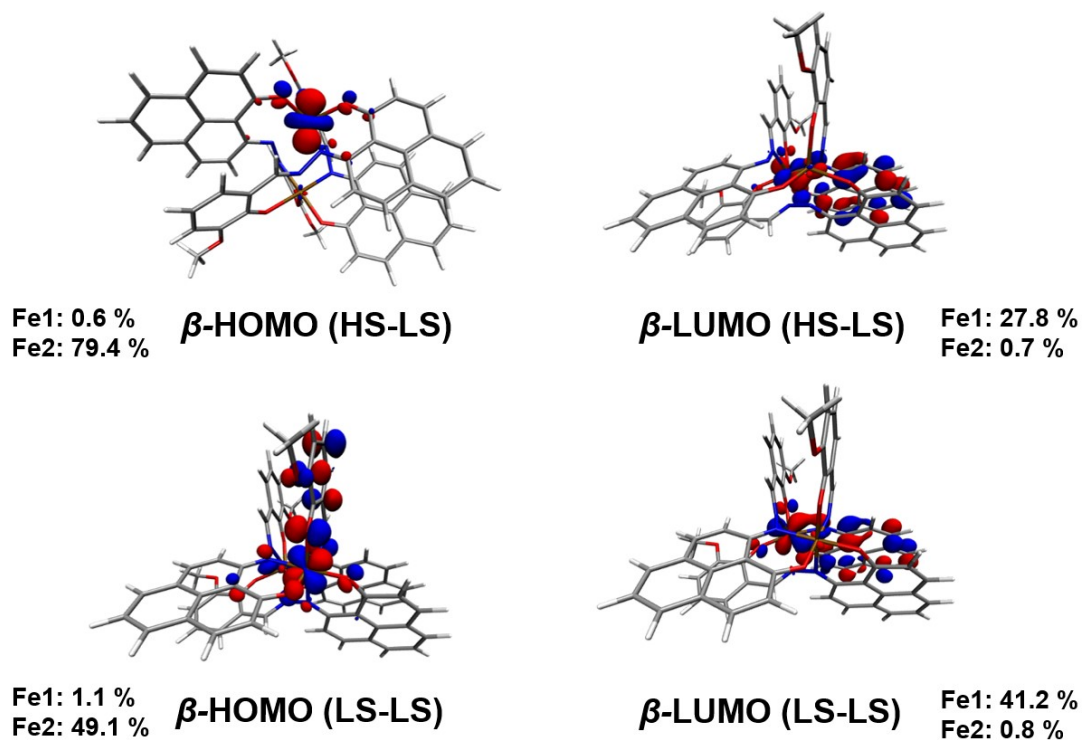

**Figure S23.** Molecular orbital plots of  $\beta$ -HOMO and  $\beta$ -LUMO orbitals of  $1^{-1}$  complex in its LS-HS ( $S = \frac{5}{2}$ ) and LS-LS ( $S = \frac{1}{2}$ ) spin states. Molecular orbitals are generated at an isosurface value of 0.04 au. Compositions of metal ions are also given for each MO.

## Theoretical computation of redox potential using DFT

The most popular method to compute the redox potential uses the Born-Haber cycle presented in Figure S24.

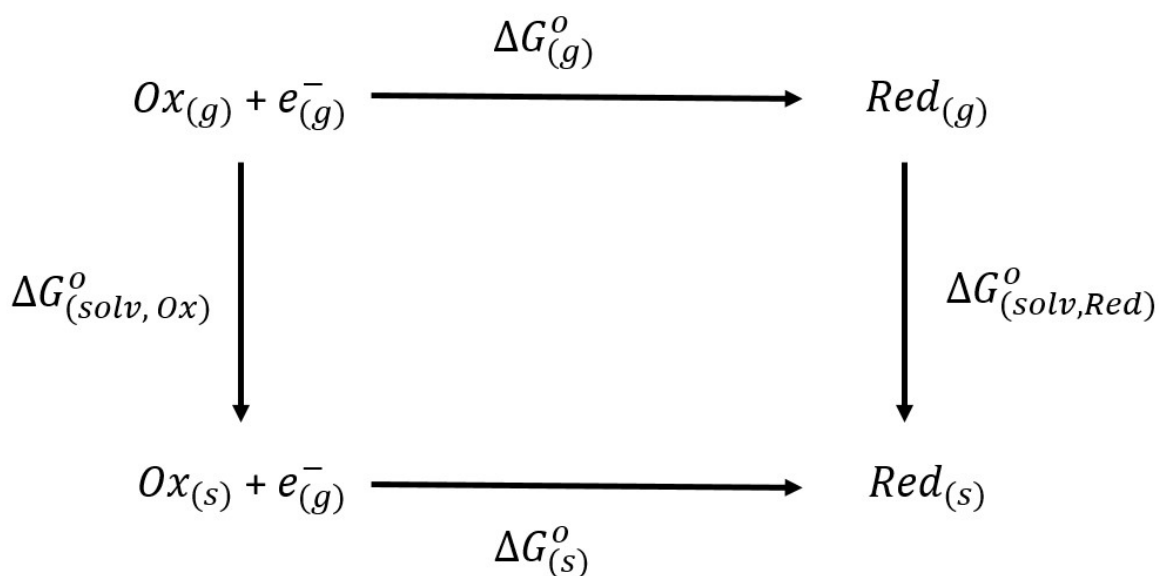

**Figure S24.** The Born-Haber cycle for redox potential calculation.

$\Delta G_{(g)}^o$  is the gas-phase Gibbs energy of the addition of one electron to the oxidant. It is a sum of the negative calculated electron affinity, and the thermal and entropic corrections.

$\Delta G_{(solv, Ox)}^o$  and  $\Delta G_{(solv, Red)}^o$  are solvation energy values of the oxidant and reductant molecule.

This is achieved with the continuum solvation model CPCM. The entity  $\Delta G_{(s)}^o$  is then calculated as:

$$\Delta G_{(s)}^o = \Delta G_{(g)}^o + \Delta G_{(solv, Red)}^o - \Delta G_{(solv, Ox)}^o$$

The absolute reduction potential  $E_{abs}^o$  of the Ox/Red couple in Solvent is defined as

$$E_{abs}^{o(Solv)} = - \frac{\Delta G_{(s)}^o}{nF},$$

where  $n$  is number of electrons involved in the half-reaction, present case  $n = 1$ .  $F$  is the Faraday constant ( $F = 96485 \text{ J. mol}^{-1}.\text{V}^{-1}$  or  $23.061 \text{ kcal/mol}^{-1}.\text{V}^{-1}$ ).

#### DFT optimized atomic Cartesian coordinates of metal complex 1

|    |           |           |           |
|----|-----------|-----------|-----------|
| Fe | 14.196272 | 6.363878  | 11.622023 |
| Fe | 15.348543 | 6.730234  | 15.274753 |
| O  | 15.196000 | 5.265561  | 10.355397 |
| O  | 15.529230 | 8.523003  | 15.951398 |
| O  | 15.018141 | 10.490514 | 17.613761 |
| O  | 17.100960 | 6.062971  | 15.838105 |
| O  | 12.457178 | 5.588630  | 11.339114 |
| O  | 10.046197 | 5.403265  | 10.329585 |
| O  | 14.347902 | 5.922643  | 16.739755 |
| O  | 14.058826 | 7.982809  | 10.586517 |
| O  | 14.389046 | 9.562321  | 8.518990  |
| N  | 16.200643 | 6.867802  | 12.283498 |
| N  | 16.129361 | 7.691839  | 13.405315 |
| N  | 15.398153 | 4.923480  | 14.071588 |
| N  | 14.266346 | 4.845253  | 13.260970 |
| N  | 13.358147 | 7.089710  | 14.506797 |
| N  | 13.432479 | 7.684123  | 13.247877 |
| C  | 16.418350 | 5.008527  | 10.063210 |
| C  | 16.646157 | 4.105615  | 8.964571  |

|   |           |           |           |
|---|-----------|-----------|-----------|
| H | 15.756819 | 3.758128  | 8.435934  |
| C | 17.900758 | 3.691421  | 8.623778  |
| H | 18.045939 | 2.994411  | 7.793157  |
| C | 19.047174 | 4.146701  | 9.344265  |
| C | 20.344882 | 3.695270  | 9.023162  |
| H | 20.461990 | 2.990610  | 8.195068  |
| C | 21.455008 | 4.124674  | 9.739479  |
| H | 22.452624 | 3.760859  | 9.484167  |
| C | 21.282560 | 5.023577  | 10.797952 |
| H | 22.145114 | 5.360365  | 11.378710 |
| C | 20.013162 | 5.502398  | 11.142294 |
| C | 18.856861 | 5.070451  | 10.419650 |
| C | 17.546655 | 5.524004  | 10.779114 |
| C | 17.394921 | 6.446150  | 11.894351 |
| C | 18.599053 | 6.865389  | 12.592702 |
| H | 18.494010 | 7.527799  | 13.447694 |
| C | 19.827306 | 6.412465  | 12.236595 |
| H | 20.704782 | 6.725269  | 12.808295 |
| C | 16.285218 | 8.961232  | 13.195085 |
| H | 16.546642 | 9.276764  | 12.174662 |
| C | 16.077761 | 10.009234 | 14.156116 |
| C | 15.679022 | 9.722256  | 15.495355 |
| C | 15.410832 | 10.836763 | 16.366336 |
| C | 15.547591 | 12.140152 | 15.903147 |
| H | 15.338846 | 12.980042 | 16.566672 |

|   |           |           |           |
|---|-----------|-----------|-----------|
| C | 15.948572 | 12.400228 | 14.572953 |
| H | 16.038483 | 13.433164 | 14.230798 |
| C | 16.207525 | 11.351883 | 13.715528 |
| H | 16.488549 | 11.538808 | 12.676501 |
| C | 14.715084 | 11.508320 | 18.533585 |
| H | 15.588563 | 12.156789 | 18.734224 |
| H | 14.417895 | 11.011058 | 19.466744 |
| H | 13.880286 | 12.144857 | 18.183942 |
| C | 17.985422 | 5.261744  | 15.372273 |
| C | 19.314187 | 5.365080  | 15.920163 |
| H | 19.446885 | 6.086085  | 16.728655 |
| C | 20.351698 | 4.632126  | 15.423946 |
| H | 21.358073 | 4.748750  | 15.836729 |
| C | 20.154592 | 3.708633  | 14.350948 |
| C | 21.231210 | 2.987200  | 13.795751 |
| H | 22.231790 | 3.141749  | 14.209033 |
| C | 21.039794 | 2.105975  | 12.737799 |
| H | 21.886296 | 1.568091  | 12.306290 |
| C | 19.753135 | 1.919840  | 12.224783 |
| H | 19.587962 | 1.237051  | 11.387840 |
| C | 18.656382 | 2.612636  | 12.753442 |
| C | 18.834849 | 3.537920  | 13.827903 |
| C | 17.736476 | 4.306452  | 14.333047 |
| C | 16.425529 | 4.153783  | 13.726015 |
| C | 16.279285 | 3.157087  | 12.681018 |

|   |           |          |           |
|---|-----------|----------|-----------|
| H | 15.303013 | 3.031599 | 12.221674 |
| C | 17.336123 | 2.439432 | 12.222361 |
| H | 17.194077 | 1.732353 | 11.401062 |
| C | 13.303955 | 4.080718 | 13.664034 |
| H | 13.474858 | 3.482325 | 14.570909 |
| C | 12.006948 | 3.971499 | 13.051294 |
| C | 11.656106 | 4.747164 | 11.907254 |
| C | 10.317457 | 4.619175 | 11.399961 |
| C | 9.406808  | 3.769863 | 12.017561 |
| H | 8.390214  | 3.685026 | 11.632054 |
| C | 9.772690  | 3.019393 | 13.156493 |
| H | 9.034776  | 2.373243 | 13.635669 |
| C | 11.051739 | 3.120201 | 13.663117 |
| H | 11.340801 | 2.562027 | 14.556919 |
| C | 8.763479  | 5.348638 | 9.760365  |
| H | 8.521021  | 4.336158 | 9.386352  |
| H | 8.762975  | 6.051012 | 8.915871  |
| H | 7.978378  | 5.651418 | 10.479310 |
| C | 13.140074 | 5.569002 | 16.979777 |
| C | 12.915137 | 4.794270 | 18.175513 |
| H | 13.795676 | 4.589061 | 18.786679 |
| C | 11.675595 | 4.337350 | 18.512251 |
| H | 11.532974 | 3.743435 | 19.419684 |
| C | 10.538850 | 4.617756 | 17.691201 |
| C | 9.255590  | 4.137817 | 18.025209 |

|   |           |           |           |
|---|-----------|-----------|-----------|
| H | 9.141275  | 3.542009  | 18.935016 |
| C | 8.152750  | 4.409004  | 17.222412 |
| H | 7.165266  | 4.029568  | 17.494111 |
| C | 8.320768  | 5.171602  | 16.062443 |
| H | 7.464853  | 5.387539  | 15.417404 |
| C | 9.579432  | 5.665428  | 15.695768 |
| C | 10.725119 | 5.398440  | 16.507075 |
| C | 12.023297 | 5.883406  | 16.137330 |
| C | 12.171146 | 6.655450  | 14.913227 |
| C | 10.979247 | 6.896143  | 14.119170 |
| H | 11.083369 | 7.426839  | 13.176788 |
| C | 9.762423  | 6.428450  | 14.495253 |
| H | 8.894145  | 6.607521  | 13.856246 |
| C | 13.208633 | 8.957577  | 13.183600 |
| H | 12.903828 | 9.467215  | 14.109217 |
| C | 13.365872 | 9.780331  | 12.014900 |
| C | 13.799218 | 9.235093  | 10.769170 |
| C | 13.971737 | 10.145428 | 9.666486  |
| C | 13.722148 | 11.502852 | 9.827815  |
| H | 13.856882 | 12.186029 | 8.988563  |
| C | 13.296997 | 12.020464 | 11.072338 |
| H | 13.115531 | 13.092290 | 11.174728 |
| C | 13.123586 | 11.172576 | 12.145731 |
| H | 12.815341 | 11.561916 | 13.118795 |
| C | 14.563871 | 10.363455 | 7.378510  |

|   |           |           |          |
|---|-----------|-----------|----------|
| H | 13.623300 | 10.861917 | 7.077369 |
| H | 14.887606 | 9.694066  | 6.570033 |
| H | 15.337246 | 11.139757 | 7.532438 |

**DFT optimized atomic Cartesian coordinates of metal complex 1<sup>-1</sup>**

|    |           |           |           |
|----|-----------|-----------|-----------|
| Fe | 14.228579 | 6.397862  | 11.685280 |
| Fe | 15.351556 | 6.740384  | 15.195331 |
| O  | 15.195809 | 5.324699  | 10.343851 |
| O  | 15.516799 | 8.609136  | 15.950178 |
| O  | 14.919246 | 10.608209 | 17.547328 |
| O  | 17.175785 | 6.050899  | 15.824916 |
| O  | 12.483232 | 5.607626  | 11.343566 |
| O  | 10.066207 | 5.426137  | 10.339519 |
| O  | 14.346857 | 5.842825  | 16.740147 |
| O  | 14.052589 | 8.014823  | 10.618250 |
| O  | 14.364396 | 9.604344  | 8.551319  |
| N  | 16.242459 | 6.913791  | 12.274152 |
| N  | 16.192595 | 7.740065  | 13.396725 |
| N  | 15.452201 | 4.883860  | 14.052483 |
| N  | 14.318881 | 4.818375  | 13.246547 |
| N  | 13.327516 | 7.093414  | 14.531388 |
| N  | 13.403098 | 7.699204  | 13.280134 |
| C  | 16.411352 | 5.039454  | 10.058417 |
| C  | 16.624943 | 4.132202  | 8.957769  |

|   |           |           |           |
|---|-----------|-----------|-----------|
| H | 15.727943 | 3.806335  | 8.427600  |
| C | 17.869468 | 3.686143  | 8.620445  |
| H | 18.000672 | 2.984432  | 7.790630  |
| C | 19.024048 | 4.111076  | 9.345357  |
| C | 20.312097 | 3.626377  | 9.030504  |
| H | 20.413727 | 2.917188  | 8.203527  |
| C | 21.427402 | 4.024832  | 9.754207  |
| H | 22.416648 | 3.630570  | 9.509319  |
| C | 21.271798 | 4.927632  | 10.814186 |
| H | 22.137965 | 5.235060  | 11.405945 |
| C | 20.015743 | 5.440525  | 11.151366 |
| C | 18.850653 | 5.038933  | 10.421641 |
| C | 17.551678 | 5.524301  | 10.776473 |
| C | 17.419842 | 6.453101  | 11.892218 |
| C | 18.632889 | 6.838998  | 12.598807 |
| H | 18.530042 | 7.498699  | 13.456579 |
| C | 19.848818 | 6.354685  | 12.248767 |
| H | 20.731339 | 6.634663  | 12.829746 |
| C | 16.304778 | 9.013370  | 13.169983 |
| H | 16.526045 | 9.329489  | 12.139135 |
| C | 16.090519 | 10.061929 | 14.125868 |
| C | 15.662784 | 9.780903  | 15.469114 |
| C | 15.347616 | 10.931175 | 16.297283 |
| C | 15.479500 | 12.224221 | 15.817868 |
| H | 15.239299 | 13.074112 | 16.458953 |

|   |           |           |           |
|---|-----------|-----------|-----------|
| C | 15.917401 | 12.466658 | 14.490889 |
| H | 16.000777 | 13.493756 | 14.128209 |
| C | 16.209832 | 11.402289 | 13.668137 |
| H | 16.509921 | 11.571521 | 12.630386 |
| C | 14.555256 | 11.640442 | 18.416234 |
| H | 15.401421 | 12.321304 | 18.637209 |
| H | 14.226971 | 11.168061 | 19.353310 |
| H | 13.722841 | 12.251679 | 18.014080 |
| C | 18.033924 | 5.242309  | 15.363138 |
| C | 19.380920 | 5.335388  | 15.896968 |
| H | 19.519604 | 6.070422  | 16.692666 |
| C | 20.408862 | 4.583621  | 15.418920 |
| H | 21.417652 | 4.693567  | 15.830211 |
| C | 20.203418 | 3.644367  | 14.357931 |
| C | 21.273451 | 2.905057  | 13.819085 |
| H | 22.272800 | 3.054843  | 14.239054 |
| C | 21.082074 | 2.015303  | 12.766499 |
| H | 21.926598 | 1.464862  | 12.345227 |
| C | 19.798343 | 1.845955  | 12.242249 |
| H | 19.630880 | 1.166059  | 11.402730 |
| C | 18.705077 | 2.556236  | 12.755353 |
| C | 18.879681 | 3.486130  | 13.831422 |
| C | 17.784684 | 4.264662  | 14.327184 |
| C | 16.478788 | 4.120953  | 13.703799 |
| C | 16.340371 | 3.135386  | 12.643514 |

|   |           |          |           |
|---|-----------|----------|-----------|
| H | 15.367407 | 3.029712 | 12.170210 |
| C | 17.391415 | 2.402169 | 12.200496 |
| H | 17.255146 | 1.700135 | 11.373265 |
| C | 13.341379 | 4.082041 | 13.663311 |
| H | 13.505721 | 3.491304 | 14.576308 |
| C | 12.036337 | 3.989678 | 13.057014 |
| C | 11.685541 | 4.768517 | 11.914122 |
| C | 10.342619 | 4.639765 | 11.414368 |
| C | 9.428946  | 3.795472 | 12.032413 |
| H | 8.409800  | 3.716786 | 11.651360 |
| C | 9.794953  | 3.048152 | 13.173164 |
| H | 9.055051  | 2.412018 | 13.663205 |
| C | 11.077539 | 3.148083 | 13.673188 |
| H | 11.366371 | 2.597146 | 14.571763 |
| C | 8.776345  | 5.390465 | 9.799002  |
| H | 8.508162  | 4.382978 | 9.424401  |
| H | 8.764650  | 6.096827 | 8.956723  |
| H | 8.006541  | 5.698181 | 10.533861 |
| C | 13.146802 | 5.509485 | 16.968846 |
| C | 12.905830 | 4.689776 | 18.144709 |
| H | 13.792117 | 4.450761 | 18.736276 |
| C | 11.666122 | 4.247781 | 18.488219 |
| H | 11.522560 | 3.631601 | 19.381775 |
| C | 10.521659 | 4.568199 | 17.688746 |
| C | 9.238190  | 4.096867 | 18.025708 |

|   |           |           |           |
|---|-----------|-----------|-----------|
| H | 9.128803  | 3.483991  | 18.925681 |
| C | 8.128183  | 4.391603  | 17.238630 |
| H | 7.139147  | 4.015721  | 17.512720 |
| C | 8.296037  | 5.168065  | 16.088420 |
| H | 7.439323  | 5.397186  | 15.447941 |
| C | 9.556063  | 5.656840  | 15.718519 |
| C | 10.710879 | 5.374391  | 16.518033 |
| C | 12.008196 | 5.858906  | 16.148204 |
| C | 12.147152 | 6.644785  | 14.930724 |
| C | 10.951120 | 6.883610  | 14.138226 |
| H | 11.057702 | 7.416929  | 13.196767 |
| C | 9.734475  | 6.422601  | 14.518343 |
| H | 8.862433  | 6.604044  | 13.884205 |
| C | 13.209328 | 8.976974  | 13.228108 |
| H | 12.924690 | 9.484964  | 14.160800 |
| C | 13.366274 | 9.805768  | 12.058588 |
| C | 13.789558 | 9.263308  | 10.808027 |
| C | 13.953994 | 10.182469 | 9.710877  |
| C | 13.708443 | 11.540152 | 9.875720  |
| H | 13.839284 | 12.225915 | 9.037389  |
| C | 13.297583 | 12.052869 | 11.126339 |
| H | 13.126051 | 13.125629 | 11.239967 |
| C | 13.134289 | 11.196689 | 12.196695 |
| H | 12.846925 | 11.582130 | 13.177829 |
| C | 14.553471 | 10.416150 | 7.427688  |

|   |           |           |          |
|---|-----------|-----------|----------|
| H | 13.620507 | 10.929244 | 7.121863 |
| H | 14.879388 | 9.756854  | 6.610592 |
| H | 15.330716 | 11.187600 | 7.594806 |

**DFT optimized atomic Cartesian coordinates of metal complex 1<sup>-2</sup>**

|    |           |           |           |
|----|-----------|-----------|-----------|
| Fe | 14.240533 | 6.266575  | 11.640320 |
| Fe | 15.311822 | 6.628729  | 15.170871 |
| O  | 15.307183 | 5.219310  | 10.240663 |
| O  | 15.489401 | 8.513336  | 15.956332 |
| O  | 14.939356 | 10.511179 | 17.577677 |
| O  | 17.143322 | 5.936322  | 15.821461 |
| O  | 12.418317 | 5.401452  | 11.263778 |
| O  | 9.950078  | 5.252349  | 10.375266 |
| O  | 14.273746 | 5.764197  | 16.722467 |
| O  | 14.003855 | 7.970253  | 10.491199 |
| O  | 14.433868 | 9.641957  | 8.510249  |
| N  | 16.263177 | 6.848521  | 12.229124 |
| N  | 16.175308 | 7.656315  | 13.361702 |
| N  | 15.435858 | 4.754877  | 14.017729 |
| N  | 14.307877 | 4.659172  | 13.208618 |
| N  | 13.274565 | 7.007073  | 14.473634 |
| N  | 13.348813 | 7.597772  | 13.215146 |
| C  | 16.528171 | 5.001580  | 9.982747  |
| C  | 16.817872 | 4.112686  | 8.872125  |
| H  | 15.943531 | 3.745793  | 8.329354  |

|   |           |           |           |
|---|-----------|-----------|-----------|
| C | 18.085173 | 3.742788  | 8.537489  |
| H | 18.264994 | 3.062913  | 7.697098  |
| C | 19.209847 | 4.219068  | 9.281309  |
| C | 20.522205 | 3.809875  | 8.969725  |
| H | 20.665770 | 3.125371  | 8.126975  |
| C | 21.612532 | 4.245000  | 9.714824  |
| H | 22.623389 | 3.906091  | 9.470959  |
| C | 21.397888 | 5.106679  | 10.796938 |
| H | 22.239060 | 5.438493  | 11.412609 |
| C | 20.113219 | 5.547533  | 11.133628 |
| C | 18.971274 | 5.115496  | 10.377740 |
| C | 17.648108 | 5.533899  | 10.724436 |
| C | 17.461099 | 6.430305  | 11.861589 |
| C | 18.649326 | 6.829388  | 12.605026 |
| H | 18.506152 | 7.452369  | 13.484709 |
| C | 19.891017 | 6.411340  | 12.260059 |
| H | 20.751824 | 6.704153  | 12.867939 |
| C | 16.259418 | 8.931519  | 13.154843 |
| H | 16.470595 | 9.266739  | 12.127451 |
| C | 16.038527 | 9.972924  | 14.126717 |
| C | 15.632310 | 9.683743  | 15.475716 |
| C | 15.343514 | 10.835719 | 16.312806 |
| C | 15.468982 | 12.132798 | 15.841015 |
| H | 15.243238 | 12.979417 | 16.492892 |
| C | 15.876877 | 12.380447 | 14.506992 |

|   |           |           |           |
|---|-----------|-----------|-----------|
| H | 15.948903 | 13.407990 | 14.141551 |
| C | 16.146579 | 11.313261 | 13.675617 |
| H | 16.417497 | 11.484832 | 12.630048 |
| C | 14.569708 | 11.539826 | 18.439857 |
| H | 15.407588 | 12.234931 | 18.657821 |
| H | 14.248744 | 11.070747 | 19.382411 |
| H | 13.729627 | 12.144649 | 18.040487 |
| C | 18.020003 | 5.161996  | 15.335132 |
| C | 19.364623 | 5.265692  | 15.874626 |
| H | 19.484792 | 5.981222  | 16.691522 |
| C | 20.412451 | 4.552968  | 15.376904 |
| H | 21.418871 | 4.674780  | 15.792834 |
| C | 20.231434 | 3.645314  | 14.286711 |
| C | 21.320326 | 2.950424  | 13.723259 |
| H | 22.316158 | 3.113506  | 14.148413 |
| C | 21.151669 | 2.097297  | 12.638922 |
| H | 22.010528 | 1.589712  | 12.192067 |
| C | 19.870534 | 1.916618  | 12.106748 |
| H | 19.720939 | 1.269474  | 11.238101 |
| C | 18.760215 | 2.578185  | 12.643281 |
| C | 18.910228 | 3.475971  | 13.752519 |
| C | 17.796630 | 4.211136  | 14.270522 |
| C | 16.489018 | 4.048842  | 13.643844 |
| C | 16.379734 | 3.095189  | 12.548795 |
| H | 15.407616 | 2.990000  | 12.073052 |

|   |           |          |           |
|---|-----------|----------|-----------|
| C | 17.449453 | 2.409755 | 12.080145 |
| H | 17.335445 | 1.740081 | 11.222893 |
| C | 13.304993 | 3.998756 | 13.688608 |
| H | 13.445486 | 3.485625 | 14.653117 |
| C | 11.991113 | 3.906380 | 13.100744 |
| C | 11.632638 | 4.637971 | 11.915258 |
| C | 10.251829 | 4.514022 | 11.486716 |
| C | 9.336579  | 3.738512 | 12.179423 |
| H | 8.300253  | 3.675178 | 11.841221 |
| C | 9.720067  | 3.042203 | 13.350941 |
| H | 8.979103  | 2.463342 | 13.907225 |
| C | 11.023347 | 3.135059 | 13.793286 |
| H | 11.328483 | 2.632378 | 14.715744 |
| C | 8.635970  | 5.249815 | 9.916343  |
| H | 8.295077  | 4.239098 | 9.608257  |
| H | 8.598739  | 5.915288 | 9.040372  |
| H | 7.920863  | 5.624723 | 10.677556 |
| C | 13.059632 | 5.515216 | 16.981953 |
| C | 12.788467 | 4.778017 | 18.205605 |
| H | 13.670684 | 4.520827 | 18.796547 |
| C | 11.530966 | 4.431402 | 18.595065 |
| H | 11.367145 | 3.878367 | 19.526694 |
| C | 10.395193 | 4.770375 | 17.794153 |
| C | 9.090268  | 4.398049 | 18.177430 |
| H | 8.961745  | 3.851238 | 19.117517 |

|   |           |           |           |
|---|-----------|-----------|-----------|
| C | 7.988359  | 4.704472  | 17.386282 |
| H | 6.982402  | 4.405018  | 17.694518 |
| C | 8.185324  | 5.391197  | 16.181417 |
| H | 7.334516  | 5.621804  | 15.532777 |
| C | 9.463017  | 5.781230  | 15.765205 |
| C | 10.614965 | 5.490584  | 16.571169 |
| C | 11.929488 | 5.882348  | 16.159140 |
| C | 12.091670 | 6.602300  | 14.897372 |
| C | 10.898017 | 6.823625  | 14.090246 |
| H | 11.028611 | 7.272015  | 13.108217 |
| C | 9.667377  | 6.443841  | 14.506378 |
| H | 8.800806  | 6.603431  | 13.858522 |
| C | 13.162468 | 8.877304  | 13.161015 |
| H | 12.893176 | 9.392080  | 14.096922 |
| C | 13.325993 | 9.716442  | 12.001107 |
| C | 13.770873 | 9.194718  | 10.734362 |
| C | 13.985946 | 10.179475 | 9.684494  |
| C | 13.752737 | 11.529485 | 9.887464  |
| H | 13.920502 | 12.244502 | 9.079115  |
| C | 13.304433 | 12.005360 | 11.145368 |
| H | 13.143040 | 13.075913 | 11.295777 |
| C | 13.106398 | 11.107504 | 12.173331 |
| H | 12.801717 | 11.461550 | 13.162333 |
| C | 14.729920 | 10.503706 | 7.458057  |
| H | 13.840696 | 11.068945 | 7.107989  |

|   |           |           |          |
|---|-----------|-----------|----------|
| H | 15.100592 | 9.883732  | 6.627537 |
| H | 15.512189 | 11.243835 | 7.725467 |

**DFT optimized atomic Cartesian coordinates of transition state TS1**

|    |                   |                   |                   |
|----|-------------------|-------------------|-------------------|
| Fe | -0.48461655555535 | -0.32077258237994 | -1.43211093331095 |
| Fe | 0.48491928246371  | 0.37310699142011  | 2.02030346559354  |
| O  | 0.50138817515903  | -1.21835370334173 | -2.95401906029831 |
| O  | 0.65230495136602  | 2.33892670758948  | 2.57776479242973  |
| O  | 0.24789330111341  | 4.46887294338122  | 4.06189074664703  |
| O  | 2.33607258825462  | -0.23376365491164 | 2.64593990421755  |
| O  | -2.39152057574865 | -0.70906226085325 | -1.69254652122479 |
| O  | -4.80596109601028 | -0.88243109759236 | -2.69257166447108 |
| O  | -0.47708391057206 | -0.49193808260250 | 3.62696625250010  |
| O  | -1.26943936792481 | 1.94264706521954  | -2.45566709206751 |
| O  | -1.15433149129926 | 3.77014335725025  | -4.34249405546330 |
| N  | 1.40339032521194  | 0.39443705284281  | -0.97821648933310 |
| N  | 1.29529187452809  | 1.28027146083343  | 0.09140757884903  |
| N  | 0.59658303338371  | -1.57784090199624 | 1.00216463757802  |
| N  | -0.52061767028610 | -1.69508255307667 | 0.17694134735790  |
| N  | -1.58388109008104 | 0.71639043305056  | 1.45793014385310  |
| N  | -1.57345481307875 | 1.42893529357734  | 0.27997685484090  |
| C  | 1.72484889707269  | -1.59187303210914 | -3.08206078174515 |
| C  | 2.01600927985967  | -2.61331152756961 | -4.06114019775686 |
| H  | 1.16300596290815  | -2.99161674868474 | -4.62918107859735 |
| C  | 3.27621110821376  | -3.09908124237933 | -4.25332513898292 |

|   |                  |                   |                   |
|---|------------------|-------------------|-------------------|
| H | 3.46376984817522 | -3.88313995458575 | -4.99441738727400 |
| C | 4.38254298224219 | -2.60860703555150 | -3.49331194254581 |
| C | 5.69118827774175 | -3.10644561277773 | -3.67920655793028 |
| H | 5.85422854523022 | -3.88182084390639 | -4.43459462383660 |
| C | 6.75688010220944 | -2.63580653676642 | -2.92271573181887 |
| H | 7.76356566357078 | -3.03707946154855 | -3.06899545630237 |
| C | 6.52736220292003 | -1.65145464048285 | -1.95421153969987 |
| H | 7.35127707403334 | -1.28322222713427 | -1.33662310408185 |
| C | 5.24778074190865 | -1.12651705733004 | -1.74449472907558 |
| C | 4.13419323010858 | -1.59491397536069 | -2.51373926295796 |
| C | 2.81365149191057 | -1.08134926128747 | -2.29660945652363 |
| C | 2.60989643893972 | -0.07901613226786 | -1.26163161105829 |
| C | 3.76938908557422 | 0.36459095150841  | -0.50555753559316 |
| H | 3.61177532695222 | 1.07689605217862  | 0.29840031381432  |
| C | 5.00870294744214 | -0.13143911725595 | -0.73769185644266 |
| H | 5.84863785657642 | 0.20128766596765  | -0.12264670170520 |
| C | 1.49237250162310 | 2.52485782764632  | -0.20698802223192 |
| H | 1.76609857458245 | 2.75922657356189  | -1.24825357532304 |
| C | 1.35586137279268 | 3.63825308256222  | 0.68273963937600  |
| C | 0.90908940901460 | 3.46230623985389  | 2.03807077924558  |
| C | 0.70885528092880 | 4.68282840854304  | 2.80043436998560  |
| C | 0.97535859112782 | 5.92978069433184  | 2.25755651405457  |
| H | 0.82827871965982 | 6.83095833122432  | 2.85481967070805  |
| C | 1.43914051896901 | 6.06130376893737  | 0.92365362500738  |
| H | 1.63950096042328 | 7.05354948155871  | 0.51315958820367  |

|   |                   |                   |                   |
|---|-------------------|-------------------|-------------------|
| C | 1.61718337463384  | 4.93123865736270  | 0.15810841316710  |
| H | 1.94489253552956  | 5.01106097302611  | -0.88271149754083 |
| C | 0.01692993115111  | 5.57636030652130  | 4.88154056106582  |
| H | 0.93989788351740  | 6.16246531410701  | 5.06070207952538  |
| H | -0.35184006731219 | 5.19056094670459  | 5.84243298019560  |
| H | -0.74368238679036 | 6.26035047189392  | 4.45465146619473  |
| C | 3.18131442291311  | -1.10314234850219 | 2.28221893767566  |
| C | 4.51944481179232  | -0.98727772285296 | 2.83376548089691  |
| H | 4.65816319156723  | -0.18004211602734 | 3.55630052126794  |
| C | 5.53800035693140  | -1.80692938171158 | 2.45880623863148  |
| H | 6.53909206616402  | -1.68168855169081 | 2.88440146051928  |
| C | 5.33320944674755  | -2.83770045100124 | 1.48665474936262  |
| C | 6.39561615388298  | -3.65219569028695 | 1.05162505257547  |
| H | 7.38632800426677  | -3.49165129323958 | 1.48824826173251  |
| C | 6.20913855400957  | -4.62899568648230 | 0.07828696061917  |
| H | 7.04851896326192  | -5.24012594167949 | -0.26221889868487 |
| C | 4.93812100665833  | -4.80520440985635 | -0.47405215645799 |
| H | 4.77567753718650  | -5.55305995043097 | -1.25520992781654 |
| C | 3.85163333512009  | -4.02245148623361 | -0.06148952553867 |
| C | 4.01940605945854  | -3.00921667291627 | 0.93829210828600  |
| C | 2.93024845346179  | -2.17028212058299 | 1.33890047635280  |
| C | 1.63226251226999  | -2.35084710990503 | 0.70780293034276  |
| C | 1.50703641609775  | -3.40073594524241 | -0.29146929722331 |
| H | 0.54136811751064  | -3.52802516393103 | -0.77516617039598 |
| C | 2.55307023934211  | -4.18594368591899 | -0.64822921685196 |

|   |                   |                   |                   |
|---|-------------------|-------------------|-------------------|
| H | 2.42409397726545  | -4.94777809988111 | -1.42211590119659 |
| C | -1.54137598377283 | -2.34819093368325 | 0.61889877215795  |
| H | -1.43929661757593 | -2.88278694741214 | 1.57549779888377  |
| C | -2.83230743522171 | -2.41124245274116 | -0.02734671822103 |
| C | -3.17977386202751 | -1.58272054335544 | -1.14356182107619 |
| C | -4.52175018739347 | -1.70727591160985 | -1.64448162813551 |
| C | -5.43474567163788 | -2.58316151708278 | -1.06876387119222 |
| H | -6.44851065096608 | -2.65666006151204 | -1.46251605487834 |
| C | -5.07362637599718 | -3.37020383544978 | 0.04515049716300  |
| H | -5.81309606012984 | -4.02602821281692 | 0.51114741044648  |
| C | -3.79713296229874 | -3.27327778918179 | 0.55442411801227  |
| H | -3.51292918737407 | -3.84929770222754 | 1.43933863713853  |
| C | -6.08186108489654 | -0.95256836412241 | -3.26064801865575 |
| H | -6.31309023848717 | -1.96549427884290 | -3.64489802774771 |
| H | -6.09707617464434 | -0.24387811968649 | -4.10056069740909 |
| H | -6.87595513565856 | -0.67314621620236 | -2.53973328636658 |
| C | -1.63964693989873 | -0.95076203571029 | 3.83397195582053  |
| C | -1.80389029402275 | -1.87258069588116 | 4.94495204872466  |
| H | -0.89575059262874 | -2.08750678751877 | 5.51214668879503  |
| C | -3.00153734924938 | -2.44074741212475 | 5.25467378016235  |
| H | -3.08519146218125 | -3.13977983856802 | 6.09309249635515  |
| C | -4.17877454605457 | -2.14383908092426 | 4.49480970439322  |
| C | -5.42102058196827 | -2.73234585319918 | 4.80203826277184  |
| H | -5.47216798664147 | -3.42878120632709 | 5.64448488009469  |
| C | -6.56247312001262 | -2.44579039543696 | 4.05827525749101  |

|   |                   |                   |                   |
|---|-------------------|-------------------|-------------------|
| H | -7.51804433084676 | -2.91370780414655 | 4.30871120650891  |
| C | -6.47108843691782 | -1.55594272934001 | 2.98344784407872  |
| H | -7.35473708555627 | -1.32949668283193 | 2.37972549373878  |
| C | -5.25364481850936 | -0.95476902574766 | 2.63968088122371  |
| C | -4.06643241037749 | -1.23325636677323 | 3.39278908555646  |
| C | -2.80929020232088 | -0.64469018218036 | 3.04304815382960  |
| C | -2.73492280607370 | 0.21762808134288  | 1.87462450313282  |
| C | -3.96573622731593 | 0.47603110748819  | 1.14263004239455  |
| H | -3.90728029514959 | 1.08940535575474  | 0.24661009269323  |
| C | -5.14807070870924 | -0.07628906708550 | 1.50929064035813  |
| H | -6.04526755254888 | 0.11028156787782  | 0.91245955333683  |
| C | -1.68655767056190 | 2.70125595839977  | 0.38814421238189  |
| H | -1.82889127629369 | 3.14722976577069  | 1.38466104715152  |
| C | -1.60912369765009 | 3.63872576992142  | -0.72982575438025 |
| C | -1.43555534535271 | 3.24619681207662  | -2.07155149278357 |
| C | -1.33391108313170 | 4.23533698293727  | -3.07878450765494 |
| C | -1.43898683534631 | 5.59452965913976  | -2.74958543973395 |
| H | -1.37201084423541 | 6.35837721158557  | -3.52340738673233 |
| C | -1.62567139763724 | 5.97393617013124  | -1.41564983228247 |
| H | -1.69166965838724 | 7.03501642980521  | -1.16069309672421 |
| C | -1.71026931892073 | 5.01193207221956  | -0.42117832533464 |
| H | -1.81201990398420 | 5.30767784200776  | 0.62444202063810  |
| C | -1.04897122938978 | 4.69792590971489  | -5.39535062014704 |
| H | -1.96447742196874 | 5.31035674866972  | -5.49360849579463 |
| H | -0.90664559576507 | 4.11380475762844  | -6.31367081558909 |

|   |                   |                  |                   |
|---|-------------------|------------------|-------------------|
| H | -0.18634271082079 | 5.37608063388774 | -5.25884174126472 |
| H | -2.11132801387276 | 1.44251020564094 | -2.50898437792624 |
| H | -1.01661681631552 | 1.46879150249066 | -4.56664278953885 |
| H | -0.56102087064938 | 0.02889530636574 | -4.36545899245076 |
| O | -1.15396978492420 | 0.57191821833708 | -4.91259749672777 |

**DFT optimized atomic Cartesian coordinates of transition state TS2**

|    |                   |                   |                   |
|----|-------------------|-------------------|-------------------|
| Fe | -0.27017844274118 | -0.28806700320260 | -2.11615248868706 |
| Fe | 0.64624255226620  | 0.53828718073248  | 1.46752918829677  |
| O  | 0.75013424355554  | -1.44969448253170 | -3.28569403707432 |
| O  | 0.87447958701110  | 2.47953648327632  | 2.07156983397440  |
| O  | 0.71734588670623  | 4.59993291182106  | 3.60822867096351  |
| O  | 2.55298244412094  | -0.03092904624140 | 1.99483046113882  |
| O  | -2.23178084832349 | -0.48663656015053 | -2.06283184789559 |
| O  | -4.71955228262820 | -0.25871903712748 | -2.77958333814257 |
| O  | -0.04813466114250 | -0.38499986326340 | 3.15480899517698  |
| O  | -2.82179868762273 | 2.32375879277770  | -2.19322467867817 |
| O  | -3.50724352369451 | 4.25806518699558  | -3.97649031631556 |
| N  | 1.53272329803460  | 0.46306131100034  | -1.47284156978840 |
| N  | 1.32896416754146  | 1.40279084788414  | -0.45954347447774 |
| N  | 0.74206403788503  | -1.43619189455579 | 0.48722485978159  |
| N  | -0.37064035818431 | -1.54499881815397 | -0.34570333565227 |
| N  | -1.53855719564163 | 0.84401966979403  | 1.20262337576659  |
| N  | -1.86462637722133 | 1.71472092091558  | 0.17495902827754  |
| C  | 1.96712163412629  | -1.86486694727260 | -3.21061584364670 |

|   |                  |                   |                   |
|---|------------------|-------------------|-------------------|
| C | 2.29886595423604 | -3.02537200640477 | -3.99538333267755 |
| H | 1.49894257275094 | -3.41896195487272 | -4.62563217403841 |
| C | 3.52032116248868 | -3.62652289531616 | -3.91361710915137 |
| H | 3.73491913277063 | -4.52941126682614 | -4.49353991608104 |
| C | 4.53470353027887 | -3.10666950320896 | -3.05507223411870 |
| C | 5.77436938435955 | -3.76347737381770 | -2.90460631496502 |
| H | 5.94624281905580 | -4.68636862553169 | -3.46599394951816 |
| C | 6.74923993892912 | -3.27236264329905 | -2.04770613013360 |
| H | 7.69297522062335 | -3.80687329724701 | -1.91904754154416 |
| C | 6.50551914914825 | -2.09188648705718 | -1.33703193877604 |
| H | 7.25965544122916 | -1.69749677232621 | -0.65118829023708 |
| C | 5.29359719724900 | -1.40478292244636 | -1.46543475476972 |
| C | 4.26200577413951 | -1.91013923790162 | -2.31854548290844 |
| C | 2.98110380774154 | -1.26824452497352 | -2.39204085420433 |
| C | 2.73408663762965 | -0.09181196793156 | -1.56056789866756 |
| C | 3.83887061114319 | 0.43030336760351  | -0.77760317475144 |
| H | 3.66196215561737 | 1.30877579964619  | -0.16418573338160 |
| C | 5.03810381149430 | -0.19912164103488 | -0.72849103194786 |
| H | 5.83003366980973 | 0.19176832756543  | -0.08471056966979 |
| C | 1.47467475415455 | 2.65196120545792  | -0.78593739976436 |
| H | 1.69584441198915 | 2.87862104762445  | -1.83625301130264 |
| C | 1.37641339739866 | 3.76963132766725  | 0.10840620754953  |
| C | 1.09817542495353 | 3.60009138263668  | 1.50857092553084  |
| C | 1.02255242101706 | 4.81605454816838  | 2.29998533674792  |
| C | 1.23630740941222 | 6.06265672228956  | 1.73450334201862  |

|   |                   |                   |                   |
|---|-------------------|-------------------|-------------------|
| H | 1.18046474351205  | 6.96196786947976  | 2.35024641565931  |
| C | 1.51813077617184  | 6.19328191826319  | 0.35077912171441  |
| H | 1.67006169354054  | 7.18613544383223  | -0.07849030931048 |
| C | 1.57824917556239  | 5.06621201387578  | -0.43794890092321 |
| H | 1.76729519865400  | 5.15053500167859  | -1.51172287323554 |
| C | 0.60082773638863  | 5.70428262340794  | 4.45771481904244  |
| H | 1.54586412424291  | 6.27824305366972  | 4.53001102703896  |
| H | 0.34564937204406  | 5.31540910066822  | 5.45392465109435  |
| H | -0.19694688330626 | 6.40047925107194  | 4.13053782886491  |
| C | 3.26163737717480  | -1.07460929195633 | 1.91692510492872  |
| C | 4.53211167687258  | -1.06110919655035 | 2.62190856207311  |
| H | 4.72976481569557  | -0.16196306696731 | 3.20937382978829  |
| C | 5.42191137942776  | -2.08729478659595 | 2.54767496629981  |
| H | 6.37174424016263  | -2.04200344920046 | 3.09056055521726  |
| C | 5.14916659187444  | -3.24083849097662 | 1.74508826378522  |
| C | 6.08616040901997  | -4.28345373366100 | 1.62217265995658  |
| H | 7.02632240708486  | -4.20539123282904 | 2.17677160582172  |
| C | 5.84336247005555  | -5.38488824618387 | 0.80634756791068  |
| H | 6.58637424752819  | -6.18086477890853 | 0.71316769259062  |
| C | 4.64426771422373  | -5.45019064619840 | 0.09226622733883  |
| H | 4.44477398670553  | -6.29540147878873 | -0.57295781187318 |
| C | 3.67882032779737  | -4.43935590058328 | 0.19617364295451  |
| C | 3.90142998721137  | -3.30207666819022 | 1.03960031209996  |
| C | 2.93365590541403  | -2.25183122740974 | 1.14353063799528  |
| C | 1.68688446768946  | -2.35963510468502 | 0.39811889867866  |

|   |                   |                   |                   |
|---|-------------------|-------------------|-------------------|
| C | 1.52283087086712  | -3.51401742986425 | -0.47207540864811 |
| H | 0.62380105118982  | -3.57027245545157 | -1.08138875512009 |
| C | 2.46122735539635  | -4.48958942542540 | -0.56072385105683 |
| H | 2.30531837166457  | -5.33187542004991 | -1.24076321849637 |
| C | -1.37894939515476 | -2.22856061870338 | 0.09465453706618  |
| H | -1.24464709393272 | -2.79646239117502 | 1.02640604574846  |
| C | -2.69691094469748 | -2.24283718617943 | -0.48915965654132 |
| C | -3.05866473999499 | -1.30738568720281 | -1.50195411083268 |
| C | -4.44426892839895 | -1.23575277656938 | -1.87641815402405 |
| C | -5.37931153166624 | -2.09794367353988 | -1.32012629848473 |
| H | -6.42681340933082 | -2.03944414349805 | -1.62069235834164 |
| C | -4.99150128778185 | -3.04144052270722 | -0.34285299496310 |
| H | -5.74238765564767 | -3.69374516493279 | 0.10781641912207  |
| C | -3.67729059821012 | -3.09664056650018 | 0.07552559802909  |
| H | -3.38154295820814 | -3.77728112257194 | 0.87766439849613  |
| C | -6.05604829521412 | 0.06443053667562  | -3.04125472290292 |
| H | -6.59066559111472 | -0.74955383491500 | -3.56996477206801 |
| H | -6.04330753838132 | 0.95934453157688  | -3.67927841116878 |
| H | -6.61273819681869 | 0.29481457141369  | -2.11221418905362 |
| C | -1.10959051135103 | -1.01547306940437 | 3.43268041934611  |
| C | -1.02718705321966 | -2.03433491006848 | 4.46498298275067  |
| H | -0.03724419232959 | -2.17670829911119 | 4.90352723652525  |
| C | -2.10380087517447 | -2.77092526295018 | 4.85164334213833  |
| H | -2.00476641581842 | -3.54014953689861 | 5.62432537749457  |
| C | -3.39228169890038 | -2.55466227530836 | 4.26435163812293  |

|   |                   |                   |                   |
|---|-------------------|-------------------|-------------------|
| C | -4.51586952059977 | -3.29996039222090 | 4.67094515642095  |
| H | -4.38226869805637 | -4.06208692297340 | 5.44478622441742  |
| C | -5.77235664539458 | -3.08002250185081 | 4.11249932551615  |
| H | -6.63387177278366 | -3.66813280371793 | 4.43891031875063  |
| C | -5.91884212837974 | -2.09509968942548 | 3.13139310719425  |
| H | -6.89764461639405 | -1.90756839221537 | 2.68043741333956  |
| C | -4.82434284352024 | -1.33865943927369 | 2.69209310910431  |
| C | -3.52048946524030 | -1.55366141839734 | 3.24442738326588  |
| C | -2.38670356694343 | -0.80184879805660 | 2.79254618335819  |
| C | -2.55811674719094 | 0.16635740506999  | 1.71837070151006  |
| C | -3.90823065351648 | 0.37016765146194  | 1.21376301419747  |
| H | -4.04869791637055 | 1.09639189921179  | 0.41686125990512  |
| C | -4.96716240965014 | -0.34199766585873 | 1.67033031233671  |
| H | -5.95753663200259 | -0.18104436218384 | 1.23614901497980  |
| C | -1.73633438126826 | 2.97406373533771  | 0.40983366897138  |
| H | -1.41677478533931 | 3.31850890254336  | 1.40186500109410  |
| C | -2.04631432708486 | 3.97419020594297  | -0.60279322689961 |
| C | -2.59088653257024 | 3.60462280600122  | -1.85843446282984 |
| C | -2.93107397404594 | 4.61353409457563  | -2.78489942742944 |
| C | -2.70447904406485 | 5.95390142007785  | -2.47333255842425 |
| H | -2.98180566297634 | 6.70523968985400  | -3.21718373135000 |
| C | -2.14860261976785 | 6.32101199100786  | -1.24051579138645 |
| H | -1.96340952222818 | 7.37262109189045  | -1.01033282885632 |
| C | -1.82520389570424 | 5.33433586752850  | -0.31657115330771 |
| H | -1.37243063237418 | 5.59649430873865  | 0.64172970953638  |

|   |                   |                  |                   |
|---|-------------------|------------------|-------------------|
| C | -2.59459935935451 | 4.07927883591636 | -5.05054570656314 |
| H | -2.21039823415810 | 5.05376820010306 | -5.41228607006233 |
| H | -3.14720008301955 | 3.59180077263396 | -5.86768811625071 |
| H | -1.73396017888053 | 3.45829722969734 | -4.75452566983451 |
| H | -2.56237880567163 | 1.73718149051250 | -1.42265608119549 |
| H | -1.62248193996655 | 1.42645208373203 | -3.28919641510301 |
| O | -0.71859428437063 | 1.07756487800009 | -3.47946737506620 |
| O | 0.02219996190359  | 2.61610762785153 | -3.54626294325252 |
| H | 0.65874126479812  | 2.32497198442248 | -4.21961326699144 |

## References

- (1) B. Caes, D. J. Jensen, Synthesis and Characterization of 9-Hydroxyphenalenone Using 2D NMR Techniques, *J. Chem. Educ.* 2008, **85** (3), 413.
- (2) G. M. Sheldrick, SHELXS-97 and SHELXL-97, Program for Crystal Structure Solution and Refinement, *University of Göttingen, Germany*, 1997.
- (3) J. Saroja, V. Manivannan, P. Chakraborty, S. Pal, A Diiron(III) Complex Containing N-N Bridges. Synthesis, Structure, and Properties, *Inorg. Chem.* 1995, **34** (11), 3099–3101.
